# Supplementary material for: Specialized neurons in the right habenula mediate response to aversive olfactory cues
Source: eLife. 2021 Dec 8;10:e72345. doi: 10.7554/eLife.72345 (PMC8691842; doi:10.7554/eLife.72345)
Supplement: Figure 1—figure supplement 2—source data 1. [file elife-72345-fig1-figsupp2-data1.xlsx]

## Sheet: Figure 1-figure supplement 2
		Left	Right
	Larva 1	8	30
	Larva 2	10	21
	Larva 3	10	35
	Larva 4	6	18
	Larva 5	13	31
	Larva 6	11	28
	Larva 7	10	45
	Larva 8	22	42
	Larva 9	14	37
	Larva 10	7	45
	Larva 11	13	44
	Larva 12	14	29
	Larva 13	21	36
	Larva 14	23	40
	Larva 15	15	22
