# Supplementary material for: Specialized neurons in the right habenula mediate response to aversive olfactory cues
Source: eLife. 2021 Dec 8;10:e72345. doi: 10.7554/eLife.72345 (PMC8691842; doi:10.7554/eLife.72345)
Supplement: Figure 2—source data 1. [file elife-72345-fig2-data1.xlsx]

## Sheet: Figure 2A-B
	Water vs. Cadaverine			Water vs. Chondroitin Sulfate
	Mean	SEM		Mean	SEM
	0.0299414	0.02188		-0.0540213	0.025479
	0.00237732	0.0194569		-0.0628448	0.0264273
	-0.0451512	0.0190183		-0.0451603	0.0227051
	-0.0663335	0.0176153		-0.04284	0.0220224
	-0.0911491	0.0161061		-0.0301892	0.0250507
	-0.0601613	0.0168341		-0.0237522	0.0236778
	-0.0268771	0.0200897		-0.0290586	0.0229986
	-0.0126759	0.0233821		-0.0486549	0.0222837
	-0.0170454	0.0202953		-0.0515936	0.0206063
	-0.0432703	0.0210072		-0.0467905	0.0248113
	-0.0801159	0.0204699		-0.0185116	0.0270622
	-0.0846218	0.0226192		-0.0185514	0.0249871
	-0.0757085	0.0240218		-0.027432	0.0231256
	-0.0604323	0.0318451		-0.0417373	0.0253424
	-0.0353368	0.0271334		-0.0072905	0.0307866
	-0.0058939	0.0244204		0.00893664	0.0340932
	0.0340798	0.0215116		-0.0065207	0.0328269
	0.0438822	0.0269369		0.0299696	0.036276
	0.0428645	0.0237087		0.0301869	0.0339143
	0.0349349	0.0289995		0.0300239	0.0281447
	0.0225188	0.0369808		0.0135821	0.0244303
	0.00532481	0.031479		0.0267582	0.023618
	-0.0053135	0.0256853		-0.0120777	0.0224191
	0.0117397	0.028659		-0.0310391	0.02235
	-0.0128137	0.0274987		0.00522802	0.0245506
	-0.0274798	0.0258395		0.0351823	0.0268575
	-0.0230076	0.0258984		0.0027141	0.0254294
	-0.0009081	0.0270527		-0.0036269	0.0257774
	-0.0223419	0.0263433		-0.0120467	0.0236856
	0.0145929	0.0268684		-0.0309389	0.0236145
	0.0202692	0.0325997		-0.0448202	0.0252688
	0.0258316	0.0321651		-0.0567827	0.0244419
	0.0318477	0.0323873		-0.044033	0.0258847
	0.0307803	0.030051		0.0203718	0.0340644
	0.0311363	0.0336712		-0.0033022	0.033767
	0.0296591	0.0347346		-0.0029664	0.0294851
	0.0493513	0.051336		0.0168406	0.0312936
	0.0416318	0.0583979		0.0571682	0.0312149
	0.0130587	0.0549121		0.0470737	0.0306146
	-0.0461011	0.0453239		0.0286032	0.0255758
	-0.0713547	0.0338634		-0.0049283	0.0231522
	-0.0285568	0.0621556		-0.0261364	0.0228461
	-0.038222	0.0584922		-0.0292658	0.0238863
	-0.0523196	0.0667037		-0.0396736	0.0220991
	-0.0878285	0.0522571		-0.0538983	0.0214524
	-0.0884881	0.0480102		-0.0444747	0.0224271
	-0.098165	0.0553038		-0.05348	0.0212897
	-0.104069	0.0443098		-0.0404737	0.0226079
	-0.128475	0.0385636		-0.0607766	0.0216362
	-0.10508	0.0362557		-0.05169	0.0206477
	-0.074274	0.0470667		-0.0419713	0.0213644
	-0.0509107	0.0542579		-0.0354954	0.0219631
	-0.0096021	0.0494356		-0.0309614	0.0238195
	-0.0301911	0.0458744		-0.0317513	0.0282241
	-0.060437	0.0412024		-0.0449518	0.0289295
	-0.0689489	0.0379105		-0.0180871	0.0335535
	-0.0778034	0.0347411		-0.0097817	0.0348184
	-0.0910833	0.0343213		-0.0120571	0.035839
	-0.0899336	0.0320808		-0.0079909	0.0341316
	-0.110515	0.0317856		-0.0075741	0.033746
	-0.137806	0.0299358		0.0216524	0.0367776
	-0.148213	0.0284046		0.0165077	0.0385091
	-0.123154	0.0319212		0.00077778	0.0378163
	-0.115959	0.0378151		0.023029	0.038885
	-0.134439	0.0343815		0.0230722	0.0350855
	-0.136678	0.0345845		0.0398738	0.0364984
	-0.13991	0.0346699		0.0233891	0.0351324
	-0.142032	0.029529		0.0182197	0.0340209
	-0.134291	0.0286769		0.0276609	0.0384618
	-0.118275	0.0272459		0.0172512	0.03718
	-0.117293	0.0286808		0.00874132	0.0344561
	-0.141553	0.0255005		0.00500443	0.032188
	-0.0929694	0.0249509		0.0172402	0.032042
	-0.0980367	0.0217492		-0.0013682	0.0325963
	-0.113534	0.0224173		-0.0035595	0.033218
	-0.111416	0.0229211		0.0259164	0.0365234
	-0.122422	0.0229541		0.0500878	0.0359239
	-0.100365	0.0243299		0.0351435	0.0355434
	-0.13252	0.0219087		0.0195136	0.0333742
	-0.142019	0.0233449		0.0119413	0.0341772
	-0.139641	0.0239305		0.00278832	0.0338163
	-0.0994936	0.0277027		0.0139559	0.0384597
	-0.0772026	0.0311222		-0.0080824	0.039233
	-0.0880588	0.0264429		0.0322655	0.0378002
	-0.117582	0.0237485		0.0576957	0.0349721
	-0.125496	0.0263319		0.0815054	0.0369411
	-0.13244	0.0270491		0.0720297	0.0353012
	-0.148249	0.0248743		0.0908457	0.0395097
	-0.160314	0.0274249		0.0604406	0.0363756
	-0.122813	0.0303725		0.0672183	0.0324276
	-0.0807391	0.0423568		0.0600329	0.0297047
	-0.048406	0.0427775		0.0420774	0.0296694
	-0.0811849	0.0403756		0.0360771	0.0284842
	-0.104133	0.0379916		0.0459817	0.0259527
	-0.0941833	0.0360878		0.0449968	0.0268268
	-0.0940609	0.0325285		0.0466676	0.0266969
	-0.0980027	0.0281256		0.0107341	0.0247291
	-0.118593	0.0255951		-0.0101571	0.0237515
	-0.10636	0.0267631		0.0008783	0.0226323
	-0.110965	0.0289708		0.0104411	0.0230581
	-0.12904	0.0277187		0.0341994	0.0269838
	-0.124167	0.0297044		0.0515562	0.0286439
	-0.10962	0.036862		0.0787928	0.0285424
	-0.0925755	0.0392086		0.0743488	0.0279627
	-0.0758401	0.036733		0.072827	0.0246359
	-0.0867709	0.034816		0.106798	0.0264149
	-0.0551584	0.0441939		0.0823739	0.0254548
	-0.0162621	0.0466692		0.055354	0.023668
	-0.0517134	0.0422639		0.0413708	0.0233912
	-0.0991192	0.0382892		0.059887	0.0237576
	-0.126593	0.0349423		0.0797612	0.0254284
	-0.139937	0.0329915		0.0751377	0.0245721
	-0.139629	0.0306816		0.0699274	0.0256496
	-0.120435	0.0298369		0.0882099	0.024929
	-0.105259	0.0370813		0.0497298	0.0229047
	-0.0855293	0.0414873		0.029254	0.0222181
	-0.07124	0.0354389		0.00415536	0.0223611
	-0.060115	0.0371002		0.0109457	0.0269111
	-0.0631103	0.0360686		0.0220406	0.0290566
	-0.0690174	0.0343959		0.0364635	0.0294467
	-0.0642867	0.0378803		0.0528383	0.0353811
	-0.0536566	0.0471326		0.0663196	0.0400814
	-0.0400679	0.0450496		0.0323389	0.0349574
	-0.0389094	0.0388236		0.0189413	0.0295184
	-0.0234033	0.0379428		0.010379	0.0268039
	-0.0360616	0.0358308		0.0132692	0.0264519
	-0.0618097	0.0342378		0.0113547	0.0255433
	-0.0614815	0.0311287		-0.0030556	0.0235068
	-0.0380649	0.0389483		-0.017231	0.022928
	-0.0887001	0.0328867		-0.0148415	0.0225415
	-0.110814	0.0319215		-0.033493	0.0246215
	-0.122527	0.0291288		-0.0278917	0.0228346
	-0.13298	0.0269251		-0.0371283	0.0233331
	-0.140585	0.0265124		0.00105825	0.0271123
	-0.11414	0.0293669		-0.0007797	0.0286283
	-0.111286	0.0282251		0.0371558	0.0371404
	-0.0769373	0.0249177		0.0261025	0.0393552
	-0.0449236	0.0240118		0.027064	0.0360485
	-0.0489351	0.0221016		0.0562517	0.0369277
	-0.0463567	0.0246768		0.0727953	0.0377895
	-0.0626559	0.0262598		0.0466669	0.034064
	-0.0400149	0.0301928		0.0512942	0.0356926
	-0.0207176	0.0300965		0.035755	0.0331746
	-0.0320129	0.026993		0.0403715	0.0329017
	-0.037618	0.0276941		0.0407608	0.0301015
	-0.0521208	0.0304623		0.0426904	0.0285056
	-0.0554243	0.0306138		0.020587	0.0276674
	-0.0156996	0.0388842		0.0212672	0.0288193
	-0.0140098	0.0412232		0.044462	0.0321611
	0.00372886	0.0465867		0.0411233	0.0358762
	0.0670525	0.0465197		0.0260655	0.033571
	0.0534393	0.0428255		0.0661978	0.0412712
	0.0195278	0.0415153		0.0780573	0.0414532
	-0.0260774	0.0384265		0.0507148	0.0386679
	-0.0432141	0.039904		0.0116186	0.0363588
	-0.0142834	0.0472922		0.00522641	0.0317793
	0.034331	0.0559002		0.00645495	0.0244379
	0.0230929	0.0548758		0.00418185	0.0263043
	0.0324139	0.052748		-0.0168154	0.0252085
	0.0199354	0.0507242		-0.0087057	0.0295446
	0.00931615	0.0462728		-0.0010645	0.0326502
	-0.0026122	0.0483331		0.00849477	0.0328141
	0.0103489	0.0510317		-0.0086574	0.0327356
	0.00289536	0.0448321		-0.0183994	0.0297894
	-0.0208002	0.0408661		0.0203216	0.0312474
	-0.0134778	0.0374284		0.0201946	0.0318431
	0.00339734	0.0324527		0.0370593	0.0312944
	0.0239134	0.0444857		0.024073	0.0280751
	0.0188278	0.0409158		0.0154305	0.0279904
	0.0003197	0.0381874		0.0100736	0.0279746
	-0.006585	0.0431591		-0.0207713	0.0274993
	0.00148954	0.0428663		-0.0293207	0.0285412
	0.00280817	0.0450161		-0.0285622	0.0259071
	-0.0104573	0.0446311		-0.03681	0.0263078
	-0.0412552	0.0394544		-0.0372662	0.0252626
	-0.0425078	0.0350623		-0.0457572	0.0231922
	-0.0516447	0.033529		-0.0115782	0.0279078
	-0.0041597	0.0329231		-0.0121333	0.0282566
	5.3922e-05	0.0406064		-0.0158314	0.0261242
	-0.0468709	0.0394285		0.026819	0.0304227
	-0.0352607	0.0349656		0.0437686	0.0302472
	-0.0593639	0.0285996		0.0344811	0.0318586
	-0.0801123	0.0236603		0.029135	0.0400616
	-0.0814962	0.0243806		0.0226749	0.0430168
	-0.100945	0.0208245		-0.000572	0.0421077
	-0.117255	0.0175999		0.0634472	0.0367871
	-0.111098	0.0205201		0.0317883	0.0316874
	-0.104497	0.0269606		0.0142928	0.0349363
	-0.1099	0.0264536		-0.0102499	0.0311891
	-0.109309	0.0225072		-0.0294256	0.0296327
	-0.0494492	0.0229201		-0.020865	0.032588
	-0.0197071	0.0280951		-0.0523742	0.0304427
	-0.0086705	0.0327069		-0.0723196	0.0290551
	-0.0323588	0.0321545		-0.0405328	0.034668
	0.00072466	0.0299473		-0.0545511	0.0320582
	-0.0216106	0.0278759		-0.0356829	0.0288725
	0.00337083	0.0341836		-0.0378537	0.030144
	0.0265168	0.0422718		-0.0381676	0.0307637
	0.0660621	0.0512432		-0.0466166	0.0331778
	0.0594116	0.0515202		-0.0176806	0.0332907
	0.0223281	0.0447179		-0.016405	0.0320191
	0.0145045	0.0437076		-0.0433934	0.0312859
	0.0190955	0.050964		-0.0530838	0.0317912
	0.0142242	0.0522119		-0.036117	0.0292739
	-0.0013112	0.0538413		-0.0467687	0.0277684
	-0.0280962	0.0475449		-0.0656276	0.0271609
	-0.0272557	0.0394256		-0.0622513	0.0254044
	-0.0204259	0.0366839		-0.02907	0.0259455
	-0.026986	0.0365888		-0.0364332	0.0225296
	0.010674	0.038527		-0.0258444	0.0230187
	0.0298375	0.0430978		-0.0295892	0.0231688
	0.00159853	0.041119		-0.0136967	0.0264738
	-0.001142	0.0397982		-0.0166095	0.0246137
	-0.014602	0.0359946		-0.0202102	0.025606
	-0.0264039	0.0367118		0.00198091	0.0305251
	-0.0521493	0.0331626		0.0138075	0.0335415
	-0.074178	0.0280226		0.0363326	0.0373881
	-0.048469	0.0364228		0.0365999	0.0389487
	-0.0359196	0.040747		0.026708	0.0378171
	-0.0268046	0.0442142		0.0463764	0.0410294
	-0.0117118	0.04798		0.0191223	0.0373853
	-0.0411201	0.0440612		0.019575	0.0384964
	-0.0526022	0.0441064		-0.0042892	0.0362473
	-0.0272358	0.0484247		-0.0137378	0.0333815
	-0.0056456	0.0411018		-0.0309412	0.0327254
	0.0019686	0.0388866		-0.0090791	0.0330864
	-0.0231571	0.0404366		0.0001015	0.0316274
	-0.0188159	0.0412789		0.00365849	0.032906
	-0.0135965	0.038577		-0.0121026	0.0332595
	-0.015645	0.0366492		-0.0283219	0.0306604
	-0.0415511	0.0353496		-0.0439197	0.029491
	-0.0583693	0.0285801		-0.0482984	0.0286066
	-0.063808	0.0296664		-0.0461099	0.0283666
	-0.0691116	0.0250973		-0.0601518	0.0269841
	-0.0481462	0.0263183		-0.0636654	0.0265871
	-0.0362374	0.0304654		-0.0487933	0.0252159
	-0.0453275	0.0332177		-0.0592381	0.0270494
	-0.0330212	0.0339584		-0.0609457	0.0260968
	-0.026192	0.0355263		-0.0643638	0.0260955
	-0.0319728	0.0376623		-0.0694172	0.0270229
	-0.0110323	0.0350518		-0.0715911	0.0254952
	0.0155984	0.0425177		-0.0697533	0.0254597
	-0.0215203	0.0406702		-0.0685542	0.0228587
	-0.0258271	0.047398		-0.0441634	0.0204421
	-0.0063007	0.0500329		-0.0502041	0.0199384
	0.00693111	0.0526382		-0.0315006	0.0219214
	-0.0010244	0.0474199		-0.0206065	0.0244372
	-0.0197872	0.0437359		0.00975774	0.0303243
	-0.034136	0.0441795		-0.0002712	0.0329814
	-0.0098313	0.0412852		0.00566922	0.0344872
	0.0305008	0.0431458		0.035816	0.0361557
	0.0753558	0.0498078		0.0181865	0.0363649
	0.066023	0.0493288		0.0191542	0.0385462
	0.0574395	0.0563581		0.0586187	0.0382695
	0.0405334	0.0488369		0.0311603	0.037247
	0.00599403	0.0473491		0.0431393	0.0422338
	0.0181305	0.0495328		0.0425645	0.0439996
	0.0189644	0.0487138		0.0721282	0.044386
	-0.0224355	0.0505077		0.0402083	0.0424895
	0.00086006	0.0524894		0.0519392	0.0419537
	0.016781	0.0518001		0.0430552	0.0400844
	0.0235349	0.0510227		0.035432	0.0407127
	0.0538907	0.05516		0.0049727	0.0409147
	0.0564125	0.0524226		0.00025613	0.0420733
	0.110708	0.0618923		0.00235528	0.043673
	0.106804	0.0605331		0.0119076	0.046318
	0.0830765	0.0611157		0.038537	0.0484475
	0.0585066	0.0595954		0.0353857	0.0467787
	0.048579	0.0615161		0.0772177	0.0531455
	0.0582597	0.0608807		0.075674	0.0554922
	0.0285716	0.0579937		0.0618376	0.0501003
	0.0155827	0.0553717		0.0300751	0.0488096
	-0.0055139	0.0526411		0.0119626	0.0475283
	-0.0072239	0.0495543		0.0262664	0.0533067
	-0.0276412	0.0457504		0.00888644	0.0543321
	-0.021816	0.05059		0.00827211	0.0507048
	-0.0333523	0.0512907		0.00509262	0.0513067
	-0.0430692	0.0517424		-0.0079436	0.0506006
	-0.0381675	0.0539117		-0.0126462	0.0477131
	-0.0522493	0.0497684		-0.0311805	0.0460056
	-0.0742303	0.0468929		-0.0196089	0.0488135
	-0.0531803	0.0498484		0.0305542	0.0556603
	0.0182271	0.0758269		0.036846	0.057177
	0.0511758	0.085219		0.0680765	0.0604869
	0.0653116	0.0885493		0.07082	0.0579149
	0.04729	0.0827459		0.0543409	0.0524254
	0.0536396	0.081838		0.0299662	0.051059
	0.0142221	0.0720594		0.0388163	0.0512427
	-0.028799	0.06222		0.0453583	0.0495247
	-0.0417889	0.0517765		0.0292131	0.0469191
	-0.027274	0.0470787		0.0422309	0.0452573
	0.0322039	0.0694078		0.0395676	0.0424982
	0.039606	0.0656497		0.0328543	0.0412816
	0.0233779	0.0564345		0.0159769	0.0379177
	0.0421726	0.0536297		0.0113001	0.0369615
	0.064325	0.0579158		0.0313754	0.0365754
	0.0311229	0.0559148		0.0199202	0.0397264
	0.0149671	0.0567754		0.0399176	0.041884
	0.0433128	0.0638501		0.0641368	0.0454873
	0.0158741	0.0572372		0.0719127	0.0434134
	0.0266508	0.0635303		0.0596532	0.0396114
	0.0117676	0.0635379		0.027557	0.0368572
	0.0151322	0.066584		0.0115476	0.0348001
	0.00142604	0.0684742		0.0325461	0.0436393
	-0.0237228	0.0624094		0.0328992	0.0485438
	-0.0587964	0.0554732		0.0257074	0.0465383
	-0.0708397	0.0550215		0.00264055	0.0441334
	-0.0823784	0.051124		0.00163753	0.0472999
	-0.089576	0.0509282		0.00683237	0.048826
	-0.0924474	0.0465424		-0.0188673	0.0484569
	-0.0901451	0.0477647		-0.0156982	0.0517403
	-0.0726852	0.0520203		-0.0406988	0.051937
	0.0106997	0.0794583		-0.0351598	0.052402
	-0.0069316	0.0940911		-0.0349199	0.0528276
	-0.0411321	0.0844828		-0.0437852	0.0496048
	-0.0062151	0.0967612		-0.0029291	0.04649
	0.0244847	0.0948537		-0.02601	0.0427841
	0.0415087	0.100144		-0.0324085	0.0402478
	0.017918	0.0973511		-0.0132225	0.0365291
	0.0141329	0.0920349		-0.029243	0.0346894
	0.0545282	0.101906		-0.0158824	0.0324966
	0.0564295	0.105443		0.00718263	0.0356544
	0.017979	0.0951432		0.0590666	0.0389283
	0.0554784	0.10374		0.0638387	0.0402611
	0.113305	0.109865		0.0545566	0.0384031
	0.110747	0.107632		0.0366042	0.0376892
	0.1005	0.0911355		0.0255278	0.038858
	0.094582	0.0767035		0.0615979	0.0418023
	0.0637936	0.0726972		0.0429855	0.0403114
	0.0542005	0.0763204		0.0487983	0.0399354
	0.0533769	0.0893228		0.0441696	0.0367708
	0.0218538	0.0857108		0.0347457	0.0342549
	-0.00756	0.0739672		0.00786279	0.0329623
	-0.0196343	0.0745801		-0.0170775	0.0327727
	-0.0494537	0.0668325		-0.0316935	0.0328126
	0.0177662	0.0861477		-0.0220352	0.032978
	0.00126381	0.0745525		-0.0228823	0.0340027
	-0.0132029	0.0656737		-0.0224803	0.0301791
	0.0494456	0.0917823		-0.0231468	0.0290561
	0.0170994	0.0860891		0.00359893	0.0302977
	-0.0047864	0.0770094		0.0140392	0.0349756
	0.0566006	0.0907972		0.0300543	0.0386218
	0.0632769	0.0910922		0.04856	0.0387366
	0.0409842	0.0852943		0.038721	0.0403805
	0.00237012	0.0756994		0.0153216	0.0395721
	-0.0353941	0.0680195		0.00596757	0.0366727
	-0.0663499	0.063754		0.00223467	0.0355391
	-0.0913793	0.0552507		0.0305006	0.0331591
	-0.0716571	0.0508121		0.0848987	0.0425415
	-0.0777663	0.051768		0.0704836	0.0413287
	-0.0251563	0.0720553		0.0797675	0.0442073
	-0.0515609	0.0647206		0.0583419	0.0438387
	-0.09434	0.0584574		0.026128	0.0399423
	-0.103326	0.0494352		0.0234619	0.0455587
	-0.0824665	0.044196		-0.0049338	0.0438804
	-0.0289889	0.0540327		-0.0320208	0.0415932
	-0.0259863	0.0624232		-0.0091595	0.0386025
	-0.0354422	0.0521349		0.0100492	0.0377261
	-0.0655372	0.0441252		0.00249937	0.0377353
	-0.0646938	0.0451788		0.00224058	0.0423922
	-0.0592705	0.0493043		0.00274757	0.0416205
	-0.0812257	0.0504727		0.0466568	0.0456173
	-0.0679077	0.0523556		0.0316503	0.0422517
	-0.0443929	0.061372		0.0142638	0.0374992
	-0.0764886	0.0559861		0.00181374	0.0353327
	-0.114045	0.0534107		-0.014125	0.0307847
	-0.0784828	0.0655935		-0.0076068	0.03098
	-0.0490994	0.0707821		0.0258896	0.0349222
	-0.0472863	0.0624536		0.0390464	0.0417976
	-0.0271601	0.054764		-0.0040619	0.0388348
	0.0251124	0.078067		-0.0301238	0.0369064
	-0.0120464	0.0826189		-0.062594	0.0334257
	-0.0289209	0.0680902		-0.060093	0.0340518
	-0.0323079	0.0641407		-0.0299119	0.0337765
	0.00128215	0.0788847		-0.0203312	0.030724
	0.0283011	0.0738892		-0.020673	0.0304444
	-0.0328704	0.0614314		0.0180726	0.0324412
	-0.0629552	0.0529662		0.0887711	0.0408113
	-0.0627251	0.0487383		0.0540039	0.0383882
	-0.0700605	0.0445828		0.0290454	0.0353738
	-0.100449	0.0421562		0.052458	0.041489
	-0.129134	0.0388872		0.0331041	0.0416098
	-0.140965	0.0382983		0.058176	0.044754
	-0.105172	0.0611596		0.0611727	0.0443796
	-0.0643393	0.0797005		0.0500103	0.0395293
	-0.0424932	0.0774185		0.0633766	0.0442487
	-0.062391	0.0824625		0.0549692	0.0511663
	-0.0911108	0.0707897		0.0667361	0.0582698
	-0.0905621	0.0690743		0.0569467	0.0606659
	-0.0614901	0.0729562		0.0177891	0.0515773
	-0.0724246	0.0678086		-0.00138	0.0491122
	-0.0521508	0.0704514		0.0218144	0.0503121
	-0.0691076	0.0627145		0.00567154	0.0454917
	-0.0965508	0.0573395		-0.0139027	0.041421
	-0.148863	0.046373		-0.0274306	0.0399809
	-0.169152	0.0475564		-0.0280243	0.0386842
	-0.147433	0.0450908		-0.0510729	0.0349315
	-0.139222	0.0513421		-0.0423907	0.0352195
	-0.115483	0.0644246		-0.016272	0.037089
	-0.096536	0.0763277		-0.0109286	0.0356661
	-0.0678812	0.0660717		-0.0041588	0.0352126
	-0.044486	0.057346		-0.0219047	0.0327196
	-0.0318498	0.0556079		-0.0231492	0.0367423
	-0.0174884	0.0691095		-0.0305581	0.0365135
	-0.0374918	0.0652162		-0.0298365	0.0342689
	-0.0452344	0.0573043		-0.0480776	0.0336865
	-0.0232973	0.0595552		-0.0212505	0.0354748
	0.00173531	0.0690663		0.0207829	0.0430034
	-0.0275559	0.0724219		-0.0010376	0.0428854
	-0.0428188	0.0693239		-0.0158782	0.0399265
	-0.0556892	0.0589387		-0.0032669	0.0391486
	-0.0422676	0.0514542		-0.0194676	0.0370419
	-0.0597539	0.0501421		-0.0177196	0.0343272
	0.00460074	0.0623092		-0.0200671	0.0347493
	-0.0120036	0.0624524		-0.0210047	0.0376153
	4.78e-05	0.0628246		-0.0229505	0.0373948
	-0.0024932	0.0551359		-0.0326659	0.0331221
	-0.01324	0.0566812		-0.0366058	0.0313894
	-0.0405532	0.0476418		-0.0366033	0.0301134
	-0.0646297	0.0539507		-0.0503978	0.0285059
	-0.0506288	0.0708407		-0.0504053	0.0294127
	-0.0438828	0.0767554		-0.0659812	0.0273815
	-0.0095319	0.0872624		-0.0774845	0.0294163
	0.00235671	0.0750576		-0.0864941	0.0265155
	-0.0003337	0.0760972		-0.0606164	0.029278
	0.00310444	0.0884789		-0.0555773	0.0304737
	-0.0374006	0.0835164		-0.0510286	0.0280753
	-0.0479157	0.0740692		-0.0699917	0.0277256
	-0.045804	0.0593423		-0.0774716	0.0289615
	-0.0609593	0.0472356		-0.0727654	0.0324981
	-0.0737897	0.0437673		-0.0816	0.0317149
	-0.0681989	0.0522167		-0.0869104	0.0295724
	-0.039643	0.0704591		-0.0881414	0.0288438
	-0.0440138	0.0608715		-0.0959943	0.0276467
	-0.0236477	0.057727		-0.0546063	0.0273405
	0.0047374	0.0702048		-0.0524681	0.0284595
	-0.0440011	0.0642715		-0.064505	0.0282604
	-0.0760864	0.0528957		-0.0785792	0.0266125
	-0.045914	0.0521476		-0.0845448	0.0306663
	-0.0373767	0.0436762		-0.0705709	0.0304517
	-0.0547511	0.0402072		-0.0493187	0.0314045
	-0.0390176	0.0400823		-0.0428437	0.03147
	-0.0414752	0.0392466		-0.0203421	0.0345949
	-0.0398618	0.043135		0.0251445	0.0319999
	-0.0250048	0.0442212		0.0336776	0.032611
	-0.0060117	0.0435684		0.00340638	0.0321654
	-0.0186704	0.0413742		0.0309696	0.0345354
	-0.0530892	0.037842		0.0263124	0.0300363
	-0.0425758	0.0330544		0.0311058	0.0312442
	-0.0388561	0.0287471		0.00344979	0.0280851
	-0.0689086	0.0295712		0.00092162	0.0310499
	-0.0727708	0.028593		-0.0207874	0.0303982
	-0.0839847	0.0309914		0.00135735	0.0295115
	-0.0858618	0.0366127		0.0792035	0.0380986
	-0.0924812	0.0354477		0.0764615	0.0423304
	-0.0762418	0.0364705		0.0686365	0.0436417
	0.0104962	0.054523		0.0548045	0.0428171
	0.00159832	0.0490119		0.0539722	0.0435716
	-0.0173623	0.0455923		0.0435018	0.0402928
	-0.029905	0.0385844		0.0256228	0.0380842
	-0.0399489	0.0410448		-0.000319	0.0367062
	-0.0012369	0.0580952		0.047255	0.047135
	-0.0123577	0.0595876		0.0412227	0.0455553
	-0.0493768	0.0513136		0.0357769	0.0422519
	-0.0831569	0.0429712		0.0435881	0.0449787
	-0.123449	0.0404613		0.0356083	0.0388401
	-0.141123	0.037217		0.01521	0.0381189
	-0.135831	0.0369719		-0.0122334	0.0358152
	-0.12267	0.0394669		-0.0291079	0.0345803
	-0.0837383	0.0509096		-0.0260171	0.0338851
	-0.0849597	0.0506664		-0.0067633	0.033825
	-0.0815293	0.0428		-0.0095085	0.0344941
	-0.0619292	0.0406848		-0.0008457	0.0348504
	-0.0917385	0.0368394		0.0191846	0.0350397
	-0.0884886	0.0336152		0.0251246	0.0340944
	-0.0871615	0.0333714		0.0357412	0.0334847
	-0.102897	0.0319208		0.0366386	0.033317
	-0.110721	0.027595		-0.0056415	0.0305522
	-0.0807491	0.0307624		-0.0296687	0.0298293
	-0.0342939	0.051376		-0.0378884	0.0297938
	-0.0085279	0.0627007		0.00525214	0.0336721
	-0.0497846	0.0573199		0.00314834	0.034355
	-0.0806874	0.04733		-0.0019971	0.0329086
	-0.0907962	0.0416915		-0.004445	0.0372204
	-0.0598793	0.0348867		-0.0183761	0.034327
	0.041646	0.0397211		-0.0226612	0.0308791
	0.0370203	0.0422373		-0.0053253	0.0301303
	-0.0090157	0.0382557		0.02504	0.0319773
	-0.0168096	0.0351711		0.0492862	0.0303435
	-0.0280524	0.0353877		0.0653719	0.0305538
	-0.0518683	0.032132		0.0654373	0.0336064
	-0.0636399	0.0309837		0.0529052	0.0341763
	-0.0231422	0.0421267		0.0297952	0.0315463
	-0.0313558	0.0382611		0.00471437	0.0306093
	-0.012457	0.0463184		-0.0219942	0.0316174
	-0.0184109	0.0563824		0.0668003	0.0384996
	-0.0410882	0.04987		0.095757	0.0422806
	-0.0326156	0.0521013		0.118231	0.0469697
	-0.0146112	0.0614858		0.107824	0.0443804
	-0.0104518	0.0502601		0.0916122	0.0424394
	0.00091484	0.0541799		0.095635	0.0402731
	-0.0269893	0.0491339		0.0749724	0.0365573
	-0.0198867	0.0380353		0.0801041	0.037855
	-0.0282338	0.0344094		0.0521225	0.0377122
	-0.0133826	0.0321046		0.0720243	0.0462386
	-0.0245099	0.0289893		0.071714	0.044003
	-0.0633282	0.0259045		0.111698	0.0469767
	-0.0426831	0.0235718		0.0884325	0.0447371
	-0.0154201	0.0258618		0.0790751	0.0430764
	-0.0254397	0.0280511		0.069316	0.0414171
	-0.0008773	0.0328888		0.0360974	0.037076
	-0.0295008	0.0362182		0.0445914	0.0368561
	-0.0315709	0.0353034		0.0507493	0.0372512
	-0.0453887	0.0351991		0.060043	0.0448913
	-0.0670042	0.0311913		0.0596425	0.0459035
	-0.0831846	0.0283265		0.0370191	0.049178
	-0.0996368	0.0281326		0.105584	0.0519747
	-0.0989289	0.0295964		0.0954298	0.0474487
	-0.105957	0.0258482		0.0956366	0.0413023
	-0.11468	0.0273672		0.0596903	0.0418577
	-0.108608	0.0266822		0.0654289	0.0402584
	-0.088532	0.031307		0.0591308	0.0389273
	-0.0833386	0.0342686		0.051593	0.0398008
	-0.0765822	0.0343918		0.017415	0.0388657
	-0.0694496	0.0332151		-0.0222874	0.0360891
	-0.0688044	0.0306484		-0.0318641	0.0370853
	-0.106597	0.0296293		-0.0052023	0.0395081
	-0.113974	0.0305212		0.00255576	0.0408273
	-0.132982	0.03119		-0.0105895	0.0392886
	-0.119778	0.033304		-0.0074217	0.036966
	-0.0989417	0.0398318		-0.0130159	0.0377884
	-0.0929373	0.0404063		-0.0229055	0.0372138
	-0.0878478	0.0418077		-0.0242432	0.0372369
	-0.10369	0.0378599		-0.0310843	0.0350172
	-0.100602	0.035687		-0.0090924	0.0326074
	-0.0851498	0.03141		0.00449331	0.0348325
	-0.0743604	0.029098		0.0235117	0.0349797
	-0.0975703	0.0264151		0.0712776	0.0397977
	-0.115503	0.0254822		0.0863807	0.0419455
	-0.0949088	0.027022		0.0719032	0.040433
	-0.0976584	0.0277106		0.0506268	0.0379698
	-0.0656523	0.0318242		0.0416246	0.0405289
	-0.0720779	0.035459		0.0328351	0.0404491
	-0.0748394	0.0387278		0.0506928	0.0377448
	-0.0600501	0.039421		0.0434961	0.0343633
	-0.056524	0.0380177		0.056196	0.0376681
	-0.0562257	0.0371549		0.0535955	0.0394186
	-0.0801515	0.0348647		0.0270249	0.0427926
	-0.118773	0.02966		0.039983	0.0480374
	-0.125258	0.029468		0.0701081	0.0549704
	-0.142214	0.0271665		0.0887721	0.0545091
	-0.139281	0.0281236		0.111176	0.0610859
	-0.162456	0.0261438		0.0988831	0.0596536
	-0.158122	0.027437		0.0799026	0.0547503
	-0.135167	0.0286306		0.0576081	0.0490193
	-0.115842	0.0345627		0.0177432	0.0442535
	-0.143677	0.0363323		0.0127544	0.0425661
	-0.16097	0.0341817		0.0152468	0.0486968
	-0.125789	0.0419334		0.0314278	0.0521629
	-0.101287	0.0480495		0.0459186	0.0526619
	-0.097459	0.0464948		0.0393123	0.0506171
	-0.0915216	0.0468973		0.0237402	0.0535324
	-0.0863101	0.0489989		0.00894462	0.0503338
	-0.0978132	0.0424665		0.0157185	0.0502039
	-0.0990322	0.0351738		0.039717	0.0546591
	-0.050431	0.0375636		0.0250306	0.0546241
	-0.0223636	0.0494435		0.0295049	0.0593131
	-0.0336184	0.0544601		0.0461916	0.0575183
	-0.04992	0.0559823		0.0571813	0.0600961
	-0.0359364	0.0663932		0.066782	0.0606627
	0.0231279	0.0641175		0.0762195	0.0654945
	0.0570695	0.06459		0.100034	0.0755029
	0.0769975	0.0674398		0.101581	0.0729027
	0.111058	0.0769884		0.0662807	0.0725364
	0.107021	0.0781161		0.111894	0.0650818
	0.130453	0.074203		0.106169	0.064367
	0.114017	0.0664747		0.107632	0.0634373
	0.110346	0.0624343		0.0678403	0.0597993
	0.075812	0.0570675		0.0853703	0.0629238
	0.0554592	0.0575163		0.0802978	0.0610017
	-0.0020627	0.0531147		0.120406	0.0637706
	-0.0316625	0.0468593		0.136106	0.067171
	-0.0445422	0.0417476		0.10325	0.0638941
	-0.0569941	0.0398785		0.0658057	0.0595033
	-0.0687553	0.0397861		0.0630261	0.0608688
	-0.0674208	0.0398741		0.0839937	0.0599053
	-0.0679572	0.0470561		0.0865432	0.0596349
	-0.0634979	0.0434681		0.0798114	0.0591059
	-0.0470567	0.0419578		0.0583582	0.0559124
	-0.0398998	0.0423744		0.037602	0.0550753
	-0.0366447	0.0389888		0.0415927	0.0548343
	-0.0525892	0.0366957		0.068962	0.0582492
	-0.0148311	0.0397999		0.0926787	0.0616732
	-0.0342931	0.0420977		0.125514	0.0694
	-0.0333212	0.0397793		0.18533	0.0772639
	-0.0109672	0.0424967		0.149516	0.0705902
	-0.0292868	0.040405		0.169382	0.0712968
	-0.0299401	0.0385135		0.181828	0.0703488
	-0.0155801	0.0428804		0.16667	0.0689708
	-0.0158075	0.0426064		0.130506	0.0670481
	-0.0292711	0.0392036		0.1114	0.0652431
	-0.0322791	0.0351102		0.110018	0.0671792
	-0.0341267	0.0332612		0.098528	0.0686766
	-0.0518816	0.0336207		0.0884291	0.0693907
	-0.0431118	0.0366204		0.0794792	0.0659395
	-0.0670282	0.0327025		0.0813898	0.0635745
	-0.0684649	0.0389793		0.0674964	0.0607631
	-0.0621349	0.0400967		0.0515223	0.0593442
	-0.0796945	0.0382092		0.0494475	0.0593565
	-0.0893522	0.0412498		0.0374602	0.0560741
	-0.0873521	0.0430446		0.0480734	0.0599732
	-0.0821667	0.0473037		0.0706417	0.0617708
	-0.0360783	0.0468262		0.0845393	0.0632202
	-0.0235151	0.0540349		0.0922983	0.0658809
	-0.0300228	0.0495679		0.0644728	0.0609147
	-0.0116641	0.0484927		0.0684875	0.0615727
	-0.0044294	0.0482759		0.069376	0.0598093
	-0.0371225	0.0418572		0.104575	0.0657992
	-0.0455076	0.0433151		0.131305	0.0658448
	-0.0697948	0.0396304		0.103705	0.0598223
	-0.0905326	0.0395649		0.0901448	0.05454
	-0.0712437	0.0414776		0.0874384	0.052825
	-0.0738129	0.0472641		0.092681	0.0527171
	-0.081408	0.0493265		0.0681584	0.0560404
	-0.0884404	0.0495406		0.0677145	0.0524388
	-0.0632074	0.0582079		0.0603781	0.0512924
	-0.0230248	0.0577294		0.04928	0.0487576
	0.0278629	0.0615062		0.0268634	0.0461178
	0.0499013	0.0621727		0.0215457	0.044609
	0.0285292	0.058883		0.0080626	0.042429
	0.00405719	0.058157		0.0107926	0.0457431
	-0.0093816	0.0582844		-0.0114246	0.0423352
	-0.0066827	0.060539		-0.0143409	0.0424955
	-0.0333464	0.0535142		-0.0282813	0.0432057
	0.00844363	0.0573063		-0.0351674	0.0429691
	0.00758901	0.061856		-0.0321482	0.0437294
	-0.0076883	0.0585225		-0.0298602	0.0456715
	-0.0175255	0.061315		-0.0196564	0.0467716
	-0.0360269	0.0541152		-0.0259829	0.0471808
	-0.0634988	0.0523251		0.00244988	0.0449705
	-0.0344499	0.0486842		0.0143011	0.0505883
	-0.0252741	0.0511671		0.00581379	0.0519699
	-0.0010528	0.0523415		0.00812662	0.0513152
	-0.0052594	0.0534846		0.00060932	0.049141
	0.056689	0.0654134		0.0173115	0.0469271
	0.03187	0.058526		0.00410582	0.0452953
	-0.0023229	0.0518482		-0.0149463	0.04463
	-0.0189302	0.0478407		-0.0120059	0.0409462
	-0.0177682	0.0444947		0.0102168	0.0447616
	-0.0154261	0.041351		0.0255688	0.0472901
	-0.0454533	0.0416815		0.0203895	0.0518528
	-0.046076	0.0425048		-0.0181925	0.0490961
	-0.0358015	0.0435245		-0.0174272	0.0472309
	-0.041054	0.0437663		-0.0307925	0.0458934
	-0.0535135	0.0463756		-0.0220858	0.0465786
	-0.0524982	0.0447263		-0.0348371	0.0433221
	-0.0498135	0.0445903		-0.0124015	0.0441465
	-0.0471104	0.0446647		-0.0039418	0.0409355
	-0.0728456	0.0426757		0.0026349	0.0391105
	-0.0581323	0.0433594		-0.013989	0.0379614
	-0.032845	0.0493365		0.00036338	0.0409366
	0.0123609	0.0589111		0.00300173	0.041394
	0.0521701	0.0764743		-0.0171389	0.0449297
	0.0425888	0.0788996		0.00568075	0.060107
	0.0138092	0.0677775		0.004098	0.0621497
	0.0130066	0.0580619		0.0350545	0.062998
	0.00301426	0.0531296		0.0407066	0.0627343
	0.0275575	0.0524288		0.0317622	0.0613343
	0.0414954	0.0503417		0.0118903	0.0571394
	0.0373982	0.0498952		0.0125863	0.0570846
	0.048724	0.0500387		0.0432249	0.0536829
	0.0632133	0.0539357		0.0612336	0.0601877
	0.0900288	0.0560906		0.0851195	0.0603099
	0.1144	0.0579833		0.131575	0.0604739
	0.0965996	0.058085		0.114819	0.0575305
	0.0866547	0.0578864		0.0800755	0.0551576
	0.075451	0.0559634		0.0578544	0.0518211
	0.0583142	0.0557193		0.0475738	0.0500756
	0.0374009	0.0521201		0.0102225	0.0475785
	0.0141699	0.0492181		0.0238249	0.0497424
	0.049048	0.0602013		0.0603098	0.0453155
	0.117102	0.0756947		0.0743995	0.0520431
	0.12872	0.0599987		0.0773296	0.0634708
	0.0619491	0.0509766		0.0548522	0.0673376
	0.0338376	0.0523407		0.0542448	0.0631543
	0.0271692	0.0449886		0.0500662	0.058671
	0.0427315	0.0431002		0.064326	0.0575612
	0.0697156	0.0484235		0.0503783	0.0549607
	0.0889759	0.0564986		0.0407865	0.0603598
	0.0696211	0.0517876		0.0406935	0.0624667
	0.0453723	0.0539435		0.0138254	0.0580078
	0.0221748	0.0492815		0.0193844	0.0529666
	6.1152e-05	0.0423026		0.00987244	0.0484376
	-0.0095606	0.0456426		-0.0190947	0.0457104
	-0.0179094	0.047757		-0.0563405	0.0440893
	-0.0270508	0.0425969		-0.0663348	0.0482106
	-0.0589276	0.0398483		-0.0705257	0.0458857
	-0.0312273	0.0392009		-0.0658362	0.0440923
	-0.03848	0.0381959		-0.0178847	0.0490146
	-0.0270339	0.0387423		0.0324743	0.056005
	-0.0068221	0.0472948		0.0425659	0.0661223
	-0.0417806	0.0448441		0.0596628	0.0646198
	-0.0459753	0.0437893		0.0436056	0.0602887
	-0.0612421	0.0399922		0.0592406	0.058469
	-0.0976982	0.0355178		0.0881639	0.0551225
	-0.0802873	0.0406334		0.0614953	0.0505717
	-0.0764628	0.0391384		0.0262461	0.0483239
	-0.0368106	0.0406358		0.0196771	0.0471627
	0.0486857	0.066353		0.0264403	0.0453409
	0.0746002	0.0726701		0.0183439	0.0467203
	0.0636664	0.0691765		0.0427686	0.0462862
	0.0567674	0.0603967		0.0616731	0.0445322
	0.0441369	0.0597868		0.0761554	0.0469995
	0.0685459	0.0646566		0.0818528	0.0515613
	0.0839575	0.062265		0.0887885	0.0562009
	0.0869384	0.0551644		0.0778095	0.0546877
	0.0526866	0.04967		0.0764501	0.054856
	0.0593839	0.0494383		0.0699011	0.0554982
	0.0346203	0.0489217		0.0552848	0.053803
	0.0252118	0.0475675		0.020174	0.0536252
	0.0119789	0.0454402		0.00215657	0.0542047
	0.023608	0.0470566		0.0117941	0.057521
	0.0742601	0.0602962		0.0204613	0.0582864
	0.112619	0.0761796		0.0345489	0.061571
	0.131895	0.084879		0.0217538	0.0598529
	0.105426	0.0823405		0.0571447	0.0582582
	0.0615634	0.0708217		0.0268516	0.0551183
	0.0458191	0.0586976		0.0550271	0.0571974
	0.0477866	0.0582662		0.0900984	0.0593697
	0.0835678	0.0698631		0.0794045	0.0620977
	0.0954974	0.0742138		0.0423195	0.0640654
	0.0954587	0.0754723		0.0436465	0.0589986
	0.0577095	0.0649166		0.0340355	0.0559118
	0.0381967	0.0548791		0.0384196	0.0527335
	0.0484069	0.0518054		0.0126173	0.0536266
	0.0230132	0.0460121		0.0235673	0.0520571
	-0.0090913	0.0424662		0.0197396	0.054436
	-0.0264752	0.0458243		0.0182324	0.0534033
	-0.0010922	0.0411012		0.0370057	0.053833
	-0.0036658	0.044033		0.0428185	0.0527941
	-0.0193101	0.0423331		0.0498085	0.0559522
	-0.0047252	0.0433782		0.0394832	0.0574126
	-0.0310518	0.0405011		0.0220383	0.0553134
	-0.0380107	0.0436218		0.0145949	0.0506369
	-0.0415565	0.0426415		0.0385061	0.0534808
	-0.0065166	0.0431328		0.0336399	0.0562822
	0.0262608	0.0438927		0.00757151	0.0550349
	0.0219953	0.0451062		0.0341157	0.0554782
	0.0075482	0.0426324		0.0393601	0.0515846
	-0.018225	0.0379213		0.0525479	0.0531815
	-0.0385092	0.0354166		0.0371942	0.0522554
	-0.0367433	0.0366476		0.0184668	0.0476526
	-0.0608735	0.033453		0.00162166	0.0465112
	-0.0897999	0.0284573		-0.0050112	0.0463458
	-0.0989312	0.029906		-0.0029467	0.0441916
	-0.100584	0.0288837		0.00115081	0.0419489
	-0.10227	0.0313205		-0.0159308	0.0445753
	-0.100128	0.030602		-0.0290633	0.0431422
	-0.100659	0.0315565		-0.0180367	0.0447661
	-0.109784	0.0337075		-0.018507	0.0452045
	-0.0710957	0.0388326		-0.0198842	0.0475694
	-0.0944903	0.0428203		-0.0403334	0.0473296
	-0.0871955	0.0432168		-0.0498266	0.0476971
	-0.0536525	0.0397167		-0.0448197	0.0455152
	-0.0671257	0.0375163		-0.0222077	0.0458849
	-0.0769754	0.0356075		0.019536	0.0429236
	-0.0529245	0.0386545		0.0101603	0.0392547
	-0.0621493	0.0361424		0.00407883	0.0437821
	-0.0399808	0.0363741		-0.0017275	0.0454466
	-0.0215937	0.0418429		-0.0333563	0.0420464
	-0.0092996	0.0453725		-0.0421153	0.0415463
	-0.0212103	0.0406782		-0.0286115	0.0412561
	0.00376486	0.0503076		-0.0192319	0.0388875
	0.0280972	0.0700673		-0.0252837	0.0408526
	0.0548374	0.0586697		-0.0036654	0.0429958
	0.00876931	0.051067		-0.0112614	0.0406309
	-0.0272241	0.0434333		-0.0003705	0.0407946
	-0.0514262	0.0400746		-0.0078269	0.0419566
	-0.0831207	0.0373199		0.0124819	0.0467544
	-0.110952	0.032127		0.0451639	0.044191
	-0.122035	0.035656		0.034427	0.0425518
	-0.0751337	0.0390841		0.0237348	0.0434506
	-0.0597436	0.0404672		-0.0099962	0.0451158
	-0.0186942	0.0463697		-0.0252972	0.0418987
	-0.0121401	0.0489146		-0.042453	0.0415284
	-0.037533	0.0451536		-0.040339	0.0428248
	-0.0424891	0.0382421		-0.0586312	0.0447373
	0.0109935	0.0463479		-0.0689557	0.0446785
	0.0565137	0.0637347		-0.0533229	0.0460933
	0.0522266	0.0574109		-0.0097445	0.0478763
	0.0328066	0.0480313		0.010129	0.0512645
	0.0587431	0.0414361		-0.0029192	0.0499503
	0.0267298	0.0383536		0.00079345	0.0512437
	-0.0017917	0.0382408		-0.0002722	0.0534354
	0.023651	0.035827		-0.0383983	0.0503761
	0.060931	0.0448132		-0.0325133	0.0478606
	0.0333093	0.0426675		-0.0307693	0.0461655
	0.00421311	0.03742		-0.0116073	0.04651
	-0.0155032	0.0340573		0.00549599	0.0452752
	-0.0367048	0.0340329		-0.0141944	0.0412136
	-0.0122178	0.0430702		-0.0070377	0.0465025
	-0.0253658	0.04484		0.0149757	0.0515935
	-0.0121913	0.0407909		0.0648892	0.0592607
	-0.0145269	0.0389662		0.0912854	0.0616897
	-0.0373896	0.0363318		0.100989	0.0600553
	-0.0647901	0.0362732		0.113385	0.0592048
	-0.0896259	0.0342552		0.0999181	0.0561274
	-0.110904	0.032759		0.085798	0.0591137
	-0.116808	0.033181		0.0497626	0.0525963
	-0.140839	0.0334626		0.00950932	0.0477185
	-0.146952	0.0301933		0.00726663	0.044469
	-0.0988917	0.0321983		0.0152215	0.0458025
	-0.0842585	0.0400342		0.0658089	0.0539917
	-0.0833168	0.0415402		0.0481476	0.0516542
	-0.0800104	0.0455605		0.0411649	0.0522801
	-0.0336614	0.0703733		0.020524	0.0523775
	-0.019365	0.0624585		-0.0004504	0.0482618
	-0.0132809	0.0521989		0.0458886	0.0497187
	-0.0170529	0.0463179		0.0560885	0.0519637
	-0.0469421	0.0392179		0.0474781	0.0502816
	-0.0291708	0.040018		0.0358617	0.0429847
	-0.0190048	0.0431586		0.0197459	0.042261
	-0.0322168	0.0419158		0.0224506	0.045982
	-0.0301224	0.0412781		0.0240635	0.0484673
	-0.0409089	0.0393666		0.0236218	0.0455293
	-0.070545	0.0374393		0.0188362	0.0460897
	-0.0826501	0.0347998		0.0114383	0.0464182
	-0.08272	0.0350094		0.015197	0.0408117
	-0.0938658	0.0333704		0.0310325	0.0411436
	-0.0959928	0.0327228		0.00620231	0.0376105
	-0.074908	0.0334058		-0.0124855	0.0350547
	-0.0433175	0.0358227		-0.0178421	0.0379196
	-0.0350649	0.0342002		-0.0229295	0.0395406
	-0.0394379	0.0357377		-0.0452331	0.0375896
	-0.0608788	0.0345835		-0.0417315	0.0393826
	-0.0671813	0.0363418		-0.0550373	0.0374347
	-0.0880304	0.0341759		-0.0447761	0.0395216
	-0.095326	0.0314928		-0.0478577	0.0387772
	-0.0974526	0.0310682		-0.0540002	0.035768
	-0.129648	0.0301985		-0.0494654	0.0335339
	-0.141957	0.0276762		-0.0477895	0.0342699
	-0.115637	0.0314806		-0.0684572	0.0326943
	-0.120825	0.031907		-0.0648092	0.0364251
	-0.112435	0.0297362		-0.0893291	0.034585
	-0.101474	0.0371173		-0.0873635	0.0341785
	-0.120957	0.0366611		-0.112099	0.0342297
	-0.0904231	0.0342749		-0.11797	0.0361174
	-0.0626255	0.0336211		-0.101741	0.038191
	-0.0504297	0.035367		-0.096249	0.040456
	-0.0549408	0.0355949		-0.0829623	0.0473071
	-0.0903815	0.0363997		-0.0621078	0.048123
	-0.0841377	0.0365527		-0.0403194	0.0543623
	-0.0758397	0.0449665		-0.013169	0.056327
	-0.0530036	0.0454357		0.0145481	0.057903
	-0.0679605	0.0407164		0.0173691	0.0592891
	-0.0512236	0.0375563		0.00194031	0.0569212
	-0.0627767	0.0323509		0.0105551	0.0544475
	-0.0781901	0.0318807		0.00544316	0.0529445
	-0.0756396	0.0319553		-0.0153299	0.0467956
	-0.0986346	0.0280405		0.00460604	0.0468728
	-0.110842	0.0308366		-0.002193	0.0471479
	-0.114265	0.0319111		-0.0192811	0.0449316
	-0.113931	0.0359039		-0.0268512	0.0423894
	-0.0688392	0.0426923		0.016339	0.0419064
	-0.0742182	0.0461853		0.0680347	0.046082
	-0.0980455	0.0428112		0.0679537	0.0432577
	-0.0895079	0.0419841		0.0453006	0.0405002
	-0.0832437	0.0458422		0.036186	0.0406607
	-0.0981693	0.0442748		0.0154615	0.0398304
	-0.121739	0.041392		0.0187195	0.038955
	-0.117116	0.0421121		0.0271802	0.0371667
	-0.101195	0.0417966		0.0154168	0.0368855
	-0.119834	0.043137		0.0180953	0.0368325
	-0.128102	0.0422818		0.00973985	0.0377299
	-0.131552	0.0416832		0.00858028	0.0355624
	-0.0923556	0.04154		0.010562	0.0368656
	-0.0673283	0.0433348		-0.0028073	0.036486
	-0.0593508	0.0459072		-0.0105247	0.0342398
	-0.0366637	0.0493598		-0.0063123	0.0349237
	-0.022076	0.050744		0.0137802	0.0380662
	-0.0259862	0.0481803		-0.0033833	0.0373045
	-0.0222319	0.0535052		0.0242315	0.0427237
	-0.0578304	0.0488668		0.0324933	0.0480017
	-0.0718187	0.046751		0.0321997	0.047645
	-0.035544	0.0503171		0.0441959	0.0456182
	-0.0168623	0.0490653		0.0319214	0.0504935
	-0.0072225	0.058025		0.0878008	0.0596683
	0.0159671	0.0637628		0.117871	0.0648611
	0.0288349	0.0705528		0.175067	0.0764611
	0.0500686	0.0784291		0.249593	0.0841175
	0.0449669	0.0867554		0.275754	0.0956345
	0.102703	0.0997139		0.27514	0.103871
	0.19726	0.103128		0.284382	0.106578
	0.248921	0.0927701		0.24371	0.105834
	0.302968	0.105694		0.272727	0.109592
	0.304474	0.107555		0.281079	0.116157
	0.357975	0.113908		0.301334	0.114008
	0.39097	0.112972		0.309472	0.113019
	0.369222	0.11891		0.272746	0.105237
	0.32514	0.113143		0.274326	0.103443
	0.287693	0.119184		0.234939	0.0983782
	0.284993	0.124174		0.209047	0.094183
	0.295792	0.133499		0.225609	0.0925577
	0.272468	0.128868		0.201758	0.0897423
	0.262119	0.124474		0.204596	0.0882444
	0.248813	0.128756		0.228634	0.0900304
	0.273442	0.130293		0.215121	0.0924348
	0.288991	0.128538		0.231311	0.0988521
	0.278537	0.129142		0.264481	0.0955504
	0.263688	0.12948		0.280171	0.0939617
	0.254238	0.121926		0.294458	0.105045
	0.28423	0.128898		0.291288	0.103894
	0.312087	0.124816		0.296417	0.110478
	0.302688	0.114514		0.292878	0.1131
	0.259353	0.109087		0.258228	0.107475
	0.242752	0.105919		0.239204	0.108535
	0.246217	0.0990726		0.262028	0.114507
	0.242218	0.0932592		0.240988	0.104663
	0.263017	0.0884039		0.225977	0.109497
	0.247757	0.0867604		0.202624	0.106292
	0.240944	0.085763		0.199884	0.102373
	0.237055	0.0835688		0.233156	0.103898
	0.232575	0.083229		0.227808	0.105298
	0.239815	0.0816755		0.202963	0.10433
	0.211799	0.0813734		0.19744	0.109156
	0.218544	0.0808543		0.22211	0.114992
	0.218029	0.0770529		0.257766	0.113358
	0.183696	0.0740591		0.289785	0.114283
	0.184514	0.0752917		0.260318	0.110651
	0.161736	0.0763949		0.238601	0.108157
	0.140055	0.0739125		0.215054	0.107996
	0.140521	0.0748242		0.232416	0.115745
	0.135852	0.0746663		0.240199	0.118303
	0.126722	0.0732398		0.222825	0.109546
	0.130316	0.0746564		0.19514	0.100092
	0.153201	0.0812279		0.184319	0.101135
	0.15265	0.0772116		0.216181	0.0979336
	0.122948	0.0765999		0.241323	0.0964105
	0.111153	0.07517		0.251186	0.0919581
	0.130201	0.0733791		0.263726	0.0925295
	0.152768	0.0733755		0.255783	0.0919698
	0.16438	0.0771944		0.240129	0.0915726
	0.131824	0.0751409		0.25576	0.0924875
	0.141616	0.0737142		0.29502	0.0992938
	0.138895	0.0741962		0.273782	0.09877
	0.152069	0.0731726		0.260333	0.096452
	0.137304	0.076454		0.25037	0.0944154
	0.101097	0.0748453		0.235709	0.0928084
	0.0965754	0.0767416		0.22867	0.0916564
	0.0790044	0.0735308		0.18414	0.0887301
	0.079493	0.0706275		0.162519	0.0837883
	0.0961948	0.0707371		0.169126	0.0825441
	0.0961591	0.0735446		0.174777	0.083955
	0.124261	0.075172		0.201074	0.0862395
	0.109283	0.0645133		0.193016	0.0865307
	0.143758	0.0760424		0.160398	0.0812494
	0.182466	0.0725741		0.136607	0.0796614
	0.160323	0.0729093		0.125106	0.0776606
	0.147064	0.0712702		0.130932	0.0783326
	0.136554	0.0772182		0.132853	0.0784173
	0.0953781	0.0733425		0.137882	0.0813848
	0.0683321	0.065479		0.117521	0.0866476
	0.134085	0.0710651		0.120516	0.0877606
	0.151974	0.0691224		0.0922361	0.0834215
	0.112208	0.0681843		0.108557	0.0837928
	0.0896956	0.0660919		0.117185	0.0849455
	0.116133	0.0740056		0.124097	0.0890689
	0.161662	0.0886241		0.109561	0.0897786
	0.146873	0.0827375		0.0972446	0.0849464
	0.109978	0.0751111		0.0788931	0.0813296
	0.0898292	0.0665264		0.0502082	0.0779041
	0.08546	0.0643345		0.0776054	0.0766708
	0.089967	0.0639026		0.0950536	0.0857129
	0.105094	0.0673619		0.0845129	0.0832696
	0.0784579	0.0698721		0.0648725	0.0802143
	0.0494789	0.0665959		0.0622415	0.0750005
	0.0565707	0.0661061		0.0835374	0.0760827
	0.094853	0.0682955		0.0742261	0.0756869
	0.0817614	0.0670992		0.0814057	0.0738499
	0.108169	0.0656505		0.118541	0.0828087
	0.0837512	0.0613085		0.134509	0.0809273
	0.0760341	0.0607531		0.109891	0.07636
	0.0881418	0.0589845		0.0755637	0.0736718
	0.0940402	0.0553944		0.0668513	0.0742927
	0.100491	0.0604389		0.0949278	0.0782936
	0.0954921	0.06035		0.0853903	0.0759494
	0.115447	0.0744764		0.088464	0.0786375
	0.0764647	0.06922		0.0912062	0.0867103
	0.034965	0.0612084		0.0600403	0.0810023
	-0.0015067	0.0552765		0.0677626	0.0833157
	-0.0342705	0.0534701		0.0995866	0.0903794
	-0.0409703	0.0483117		0.108415	0.0916615
	-0.0497836	0.0457636		0.156419	0.0938433
	-0.0455338	0.0440079		0.15255	0.0917708
	-0.0260009	0.0431256		0.130724	0.0852444
	-0.0304833	0.0467513		0.116853	0.0786149
	0.00635424	0.0539022		0.139238	0.0733812
	0.0125258	0.057634		0.113065	0.0717501
	0.045836	0.0650494		0.100912	0.0747577
	0.0869601	0.0609098		0.132276	0.0813467
	0.0803725	0.0593462		0.138999	0.0888471
	0.0656167	0.0589524		0.163041	0.091647
	0.0874248	0.0615312		0.188074	0.105694
	0.0482573	0.0573496		0.189356	0.107961
	0.0893278	0.0574934		0.157708	0.100827
	0.0844022	0.0548425		0.147927	0.0998268
	0.0633486	0.0582322		0.16832	0.107434
	0.0733638	0.064184		0.169342	0.0998665
	0.0444956	0.0586078		0.159633	0.0991782
	0.0724093	0.0638361		0.150214	0.0984884
	0.0677772	0.0639929		0.131072	0.0912593
	0.039433	0.0594816		0.132646	0.0838903
	0.0442474	0.0559919		0.151573	0.083138
	0.074928	0.0580857		0.132096	0.0801354
	0.0527426	0.0521882		0.101548	0.079329
	0.0394525	0.0506359		0.104794	0.0797927
	0.0339031	0.0516986		0.137245	0.0859384
	0.0113588	0.046181		0.155814	0.0893844
	0.0113506	0.0453515		0.18271	0.0985203
	0.0166854	0.0451625		0.185337	0.0967873
	-0.0162078	0.0481254		0.188446	0.0906632
	0.0121126	0.0484211		0.159096	0.0851359
	0.0020858	0.0473848		0.160728	0.0839304
	-0.0128813	0.048206		0.129378	0.0805699
	-0.0317782	0.0470397		0.136825	0.0866481
	0.0101842	0.0550915		0.220759	0.0898343
	0.0777989	0.0742195		0.232426	0.0881006
	0.0466445	0.0680795		0.221372	0.0849766
	0.0144435	0.0588115		0.196012	0.0840908
	-0.0027983	0.0539431		0.176206	0.0794456
	0.0257583	0.0548498		0.21981	0.0848445
	0.0587152	0.0569029		0.207586	0.0834834
	0.0650208	0.0606543		0.205169	0.0829369
	0.0860528	0.0597268		0.216098	0.0790976
	0.0894281	0.0633776		0.200869	0.072351
	0.0823665	0.0648112		0.21681	0.0811288
	0.0908505	0.0732493		0.248909	0.0860874
	0.0564363	0.0662085		0.228754	0.0856245
	0.0253316	0.0630427		0.203566	0.083346
	-0.0010231	0.0565196		0.192622	0.081135
	-0.0405049	0.0530555		0.193398	0.0825984
	-0.0422339	0.0522432		0.171174	0.0767296
	-0.0680143	0.0504496		0.165146	0.0774267
	-0.0533774	0.0505848		0.171481	0.0770475
	-0.0402322	0.0498479		0.22994	0.0805577
	-0.0355891	0.0477885		0.213153	0.0778656
	0.00507425	0.0560937		0.233464	0.0798482
	0.0304818	0.0540604		0.246791	0.083027
	0.0359134	0.0594546		0.221927	0.082168
	0.00035338	0.0547892		0.209133	0.0824097
	-0.0439154	0.0497331		0.201129	0.0819199
	-0.0613411	0.0481215		0.215837	0.0859286
	-0.0627764	0.0442583		0.212585	0.0810969
	-0.0656315	0.043989		0.200775	0.0793363
	-0.0795164	0.0450561		0.194075	0.0822936
	-0.101621	0.0442629		0.196179	0.0841937
	-0.108584	0.0430316		0.182258	0.0815604
	-0.100319	0.0431076		0.188928	0.085825
	-0.0552108	0.0498426		0.210181	0.0899563
	-0.0475122	0.0526695		0.208818	0.0841436
	-0.0478284	0.049389		0.177903	0.0812962
	-0.0695156	0.0465696		0.154238	0.0831071
	-0.0773961	0.0454831		0.151694	0.0823243
	-0.0990939	0.0439869		0.133287	0.0794601
	-0.0980935	0.0406133		0.16765	0.0810944
	-0.0796646	0.040901		0.17233	0.0812787
	-0.0807381	0.0389482		0.157261	0.0799086
	-0.0628957	0.0429846		0.125329	0.0743676
	-0.0533099	0.0421952		0.12273	0.0725079
	-0.0481176	0.0439994		0.113403	0.0690679
	-0.0201375	0.0446027		0.149215	0.0763776
	-0.0228166	0.0443963		0.207306	0.0852088
	-0.0527347	0.044886		0.204922	0.0814274
	-0.0586142	0.0480285		0.184316	0.0777722
	-0.044142	0.047287		0.154539	0.0733996
	-0.0594238	0.0464952		0.128977	0.072383
	-0.0569226	0.0486709		0.14885	0.0734845
	-0.073621	0.0501994		0.195654	0.0758952
	-0.0695923	0.0516177		0.16715	0.0749756
	-0.0500002	0.0613082		0.174758	0.0802825
	-0.03051	0.0676409		0.168206	0.0802006
	-0.0032569	0.0660651		0.143394	0.0781975
	-0.0271134	0.0605164		0.144381	0.0781587
	-0.0475977	0.0553816		0.155849	0.0743213
	-0.0726008	0.0508988		0.17341	0.0749356
	-0.0876268	0.0473641		0.177518	0.075721
	-0.0704501	0.0436677		0.186599	0.0799038
	-0.0768352	0.0450562		0.225459	0.0843659
	-0.088905	0.0447928		0.241046	0.0850881
	-0.102896	0.0391369		0.241395	0.0901637
	-0.109357	0.0423752		0.230461	0.0914031
	-0.0613686	0.0437963		0.194704	0.0903766
	-0.0564103	0.0439698		0.192722	0.0947229
	-0.0740934	0.0434618		0.188978	0.0947932
	-0.0756932	0.0432606		0.219304	0.0903724
	-0.0621004	0.0407422		0.219829	0.092427
	-0.0392673	0.0423091		0.207186	0.0873934
	-0.0144583	0.0471453		0.234803	0.0926519
	0.0520128	0.0664105		0.222701	0.0976835
	0.0331349	0.0582812		0.236604	0.0924336
	-0.0119825	0.0543079		0.225415	0.0900444
	-0.0292325	0.0493029		0.21461	0.0893746
	-0.0074654	0.0522403		0.193186	0.0859245
	-0.0113495	0.0526609		0.169665	0.0839764
	-0.0419038	0.0479728		0.129668	0.0816449
	-0.0431947	0.0482058		0.161869	0.0881679
	-0.0543559	0.046943		0.175408	0.0880344
	-0.0705914	0.0485126		0.197356	0.0948143
	-0.0637289	0.0444149		0.190353	0.0983745
	-0.0526365	0.0447708		0.17292	0.102407
	-0.0489569	0.0442043		0.135544	0.0998988
	-0.034019	0.0468046		0.131206	0.0978192
	-0.0543462	0.0452382		0.121804	0.0935209
	-0.0456279	0.0451191		0.115926	0.087238
	-0.0421008	0.0440811		0.148754	0.091593
	-0.0571991	0.0436999		0.152276	0.0933057
	-0.0820663	0.0436131		0.153267	0.101387
	-0.102329	0.0440754		0.180429	0.0988724
	-0.113143	0.0431386		0.196098	0.0929695
	-0.0735559	0.0458119		0.203862	0.0961136
	-0.0687651	0.0532689		0.17082	0.0881733
	-0.0714853	0.0563669		0.184654	0.095635
	-0.0841406	0.0544176		0.15846	0.0878302
	-0.0792773	0.0492506		0.182903	0.0954178
	-0.0785034	0.048419		0.18234	0.0971959
	-0.094058	0.0434526		0.213217	0.104859
	-0.0893256	0.0471238		0.2023	0.102596
	-0.0903664	0.0479593		0.210238	0.100479
	-0.117126	0.0483401		0.195914	0.0970309
	-0.135017	0.0480487		0.167489	0.0985976
	-0.143729	0.0455599		0.156484	0.0964974
	-0.111978	0.0486175		0.139739	0.0944137
	-0.139551	0.0456087		0.151533	0.0914382
	-0.12289	0.0454237		0.148195	0.0896091
	-0.0931016	0.0522704		0.177412	0.0909854
	-0.0859877	0.0526482		0.180941	0.0966195
	-0.0841488	0.0486858		0.152256	0.0916665
	-0.110014	0.0491873		0.148134	0.090186
	-0.107004	0.0486084		0.148009	0.0881671
	-0.0822989	0.0515519		0.126091	0.0875272
	-0.0667193	0.0514331		0.0943256	0.0797455
	-0.068036	0.0459671		0.107509	0.0827038
	-0.0588753	0.0465171		0.0899577	0.0730673
	-0.0533678	0.0474147		0.129257	0.0755723
	-0.0705322	0.0468512		0.138461	0.0745481
	-0.102092	0.0477113		0.142853	0.0707291
	-0.102455	0.0444152		0.119449	0.0674997
	-0.0902523	0.0477317		0.113126	0.0640538
	-0.0915461	0.0452353		0.132185	0.0668911
	-0.0893602	0.0478938		0.123313	0.0699358
	-0.116331	0.0451778		0.141409	0.069388
	-0.0851546	0.0462101		0.131877	0.0631071
	-0.0734867	0.0438036		0.102747	0.0636308
	-0.0434955	0.0479983		0.12443	0.0711873
	-0.0655851	0.0450444		0.108744	0.0713889
	-0.0773142	0.0452747		0.0885203	0.0668429
	-0.087334	0.0476495		0.0828049	0.0653884
	-0.0947159	0.0488165		0.0659134	0.0636822
	-0.104435	0.0511795		0.0848839	0.062265
	-0.0874777	0.0554604		0.0838389	0.0623854
	-0.079695	0.0528455		0.0686075	0.0599436
	-0.0830062	0.0530712		0.067098	0.0623792
	-0.0938139	0.0519847		0.104358	0.0632595
	-0.0808295	0.0475908		0.0831838	0.0614945
	-0.0945503	0.0493589		0.0833066	0.0663196
	-0.102183	0.0493773		0.0979034	0.0665412
	-0.105642	0.0496197		0.0873322	0.064994
	-0.11479	0.0507546		0.0755412	0.0671859
	-0.10242	0.0511388		0.0685348	0.0694624
	-0.0832656	0.0508142		0.0936503	0.0669292
	-0.108351	0.0496615		0.117314	0.0665801
	-0.0792584	0.0524302		0.181618	0.070424
	-0.0797233	0.0518487		0.170432	0.0656569
	-0.0713962	0.0617562		0.156	0.0635882
	-0.0622195	0.0598887		0.120587	0.0593719
	-0.0453201	0.0601398		0.0877328	0.0622314
	-0.0758781	0.0575999		0.0864637	0.0673584
	-0.0731123	0.053909		0.0828165	0.0655298
	-0.0747131	0.0516904		0.0973482	0.0640381
	-0.0918187	0.0531929		0.0888528	0.0593318
	-0.0715828	0.0587445		0.0764138	0.0573063
	-0.0832122	0.0581609		0.0577266	0.0547489
	-0.0798456	0.0639127		0.0722804	0.0556422
	-0.078499	0.0617538		0.0907267	0.0571537
	-0.0899431	0.0567078		0.107095	0.0603139
	-0.125134	0.0570983		0.131064	0.0630392
	-0.10457	0.0534963		0.121353	0.0649088
	-0.0834556	0.0541459		0.121452	0.0664832
	-0.081912	0.0536046		0.103925	0.0690359
	-0.0915678	0.0524416		0.121076	0.0733373
	-0.107372	0.0494411		0.139226	0.0749405
	-0.0882904	0.0538666		0.14147	0.0755174
	-0.0720772	0.0547185		0.134778	0.0739302
	-0.0808225	0.0518564		0.102156	0.0692261
	-0.0497996	0.0493444		0.098957	0.0761897
	-0.0320641	0.0520104		0.0866279	0.0717828
	-0.021947	0.0551062		0.0900989	0.0709305
	-0.0380029	0.0540399		0.0929078	0.0677261
	-0.0504994	0.0557595		0.0889589	0.0677443
	-0.0686423	0.0543809		0.10225	0.070377
	-0.0995934	0.0549074		0.112474	0.0685116
	-0.0624464	0.0584661		0.110862	0.0665726
	-0.0718885	0.0625113		0.119945	0.0676489
	-0.0777025	0.0580063		0.12608	0.0686783
	-0.0917569	0.0557829		0.10467	0.0646077
	-0.0635465	0.0602319		0.0807571	0.0644625
	-0.0249487	0.0668836		0.106386	0.0681507
	0.0702831	0.0815367		0.115448	0.0655272
	0.0606578	0.0791361		0.118934	0.068004
	0.0876432	0.0836764		0.110229	0.0682296
	0.11493	0.0846733		0.134805	0.0691217
	0.122804	0.0835561		0.143966	0.0751767
	0.162653	0.0887649		0.138684	0.0727981
	0.197709	0.0937076		0.143965	0.0746462
	0.247102	0.111336		0.153596	0.0818275
	0.251064	0.112789		0.163431	0.0850145
	0.213402	0.108512		0.187869	0.0884163
	0.207455	0.105081		0.205538	0.0903823
	0.271501	0.113864		0.218905	0.0914523
	0.275931	0.106763		0.238995	0.0965456
	0.307734	0.107156		0.289831	0.0970752
	0.306314	0.100924		0.249493	0.0931036
	0.249884	0.0880486		0.25615	0.0918584
	0.24166	0.0928386		0.21923	0.0871103
	0.227017	0.0950763		0.208444	0.0859623
	0.208478	0.0943732		0.173368	0.0859845
	0.217831	0.108835		0.183105	0.0900274
	0.219243	0.118382		0.192748	0.0949567
	0.178382	0.116108		0.209472	0.100083
	0.154988	0.108017		0.226861	0.100925
	0.135541	0.10206		0.237248	0.101504
	0.148004	0.097886		0.231448	0.0990218
	0.13769	0.0960213		0.265619	0.101346
	0.1218	0.0911617		0.244916	0.101305
	0.108677	0.0873196		0.22583	0.0948364
	0.0860814	0.0903828		0.280157	0.0967321
	0.0904129	0.0915031		0.337305	0.103502
	0.0776968	0.0934027		0.385339	0.106566
	0.104891	0.097792		0.372116	0.109123
	0.0631038	0.0948915		0.342062	0.108558
	0.0393121	0.0899715		0.341477	0.103332
	0.0215761	0.0830029		0.308608	0.10409
	0.0158072	0.0804313		0.303575	0.111296
	0.0453283	0.0757855		0.321378	0.109642
	0.054915	0.0698736		0.325931	0.108374
	0.0518623	0.0712417		0.314018	0.111719
	0.0525017	0.0716172		0.289626	0.112021
	0.0536965	0.0710873		0.289616	0.113267
	0.0447023	0.0692309		0.290889	0.112329
	0.0250047	0.0656006		0.30745	0.115335
	-0.0023025	0.0632858		0.301575	0.108821
	-0.0151724	0.0584971		0.292127	0.101886
	0.0003662	0.0567061		0.282512	0.100639
	0.0263785	0.0553509		0.257321	0.101703
	0.0572667	0.0645135		0.253704	0.103501
	0.0289873	0.062284		0.249767	0.101209
	0.0826716	0.0614627		0.242678	0.107018
	0.105505	0.0625499		0.214367	0.101739
	0.107067	0.064853		0.196985	0.0964687
	0.081139	0.0635003		0.223291	0.0922388
	0.0668397	0.0622201		0.269719	0.0952087
	0.0587891	0.0612324		0.265697	0.0996554
	0.0359075	0.059027		0.246731	0.100019
	0.00892576	0.0561079		0.212808	0.0983422
	0.0028571	0.0567242		0.21212	0.0963972
	-0.0043228	0.054854		0.204874	0.0926508
	0.0144523	0.0547376		0.191587	0.094106
	0.021483	0.0507482		0.191575	0.0947266
	0.0342016	0.0559839		0.225637	0.0975929
	0.0358838	0.0544009		0.247249	0.0943582
	0.0269926	0.0538695		0.22348	0.0927137
	7.7457e-05	0.0537098		0.208018	0.0901758
	0.0201626	0.0525237		0.181962	0.0854462
	0.00367215	0.0536168		0.187857	0.0921154
	0.00802324	0.0534132		0.212868	0.0928393
	0.0402908	0.0550218		0.207087	0.0901455
	0.0678485	0.0526682		0.211394	0.0919979
	0.0646881	0.0490452		0.219957	0.0971022
	0.0338837	0.0471253		0.201206	0.0896148
	0.0491291	0.0530122		0.242362	0.100428
	0.021238	0.0515865		0.221514	0.0978254
	-0.0018009	0.0510213		0.205524	0.0985683
	0.00864375	0.0543739		0.220645	0.101841
	-0.0108643	0.0538736		0.206229	0.101512
	0.00060502	0.0516035		0.185977	0.0972664
	-0.000602	0.0498887		0.148554	0.096188
	-0.0188129	0.0501863		0.192269	0.0971509
	-0.017355	0.0520041		0.186444	0.097761
	-0.0021081	0.0523819		0.183004	0.092036
	-0.0015978	0.0527493		0.18555	0.094986
	-0.0262541	0.0518794		0.157972	0.0904759
	-0.0432508	0.047689		0.144849	0.0904486
	-0.0683944	0.0473983		0.154272	0.0933271
	-0.0500635	0.048815		0.148966	0.0884086
	-0.0669251	0.0489209		0.123534	0.0844199
	-0.0639885	0.0488744		0.106998	0.0865961
	-0.0107728	0.0481874		0.0981156	0.0901373
	-0.0074108	0.0502013		0.122971	0.0884418
	-0.0363585	0.046797		0.128768	0.0943467
	-0.0384094	0.0457038		0.100891	0.0883846
	-0.0433108	0.0439306		0.103567	0.0900812
	-0.0578934	0.0438304		0.139043	0.096
	-0.0559313	0.0451206		0.145157	0.0897518
	-0.0608387	0.0467726		0.148224	0.0913475
	-0.0436877	0.0516814		0.120356	0.0867477
	-0.05006	0.0512044		0.126254	0.0903102
	-0.0346309	0.0538718		0.115488	0.0897816
	-0.0350368	0.057328		0.113767	0.0806287
	-0.0493605	0.0580212		0.120793	0.0731462
	-0.0596155	0.0550623		0.129802	0.0781827
	-0.0826181	0.0542389		0.13841	0.0833692
	-0.054269	0.0545771		0.149151	0.0878351
	-0.0648327	0.0553125		0.153871	0.0901965
	-0.0482509	0.0573325		0.137158	0.08864
	-0.0386652	0.0576303		0.131153	0.087284
	-0.0680974	0.0563158		0.105063	0.0770735
	-0.0658503	0.0557049		0.110636	0.0798646
	-0.0698787	0.0568364		0.0994986	0.0770395
	-0.0507446	0.0545189		0.0935317	0.0766397
	-0.037794	0.0620176		0.112085	0.0728044
	-0.0336436	0.0637581		0.158459	0.0746511
	-0.0469161	0.0585441		0.18474	0.0722668
	-0.0450144	0.0527819		0.189565	0.0807078
	-0.025184	0.05535		0.156993	0.0819881
	-0.0127801	0.0550334		0.145008	0.0821396
	0.0964982	0.0783585		0.139629	0.0816717
	0.110905	0.0826301		0.154128	0.0818588
	0.0851009	0.0708277		0.14053	0.0846009
	0.0811863	0.0635087		0.141868	0.0859397
	0.044226	0.0583094		0.158603	0.0891133
	0.0163045	0.05696		0.126173	0.0898531
	-0.0107831	0.0550433		0.13777	0.0928623
	-0.0396093	0.053775		0.160698	0.101359
	-0.0111693	0.0552204		0.142974	0.0968174
	-0.0125105	0.0589263		0.126067	0.0923145
	0.00076668	0.0668819		0.128477	0.0908427
	-0.0255148	0.0591471		0.126967	0.0861126
	-0.0087251	0.0681031		0.127118	0.0903693
	-0.0094928	0.0605975		0.145581	0.0942381
	-0.0022056	0.0598788		0.168276	0.0899756
	-0.0057118	0.0622031		0.205346	0.0888503
	0.0126652	0.0684568		0.192295	0.0859261
	0.0161116	0.0650135		0.18117	0.0838259
	0.0388393	0.0769737		0.181874	0.0849437
	0.0343265	0.0718571		0.179364	0.0879927
	0.0084324	0.0664769		0.169307	0.0879613
	-0.0125845	0.0589115		0.147752	0.081359
	-0.0222073	0.0547372		0.150351	0.0780714
	-0.0407108	0.0515743		0.158211	0.0722032
	-0.0088003	0.0561322		0.148946	0.0689091
	-0.0169469	0.053241		0.127118	0.0629808
	0.0159655	0.0613918		0.154324	0.0635167
	0.0185728	0.0704915		0.194229	0.0660375
	0.00968601	0.072482		0.17249	0.0670312
	0.0214838	0.0635172		0.152745	0.0677633
	-0.0047278	0.0592983		0.169591	0.0757393
	0.0327913	0.0581317		0.163893	0.0716534
	0.0235922	0.0547806		0.163659	0.0727986
	0.0211869	0.0595464		0.177037	0.0825877
	0.0226301	0.0631906		0.195515	0.0801644
	0.0180804	0.0641681		0.180784	0.0799329
	0.016914	0.0665126		0.17423	0.0730957
	0.047356	0.0678381		0.142822	0.0674174
	0.096483	0.072436		0.134587	0.0642291
	0.0854962	0.0707006		0.140322	0.0672176
	0.0565762	0.0659843		0.193379	0.0795395
	0.0584353	0.067566		0.209897	0.0833273
	0.036407	0.0651177		0.202852	0.0853699
	0.01416	0.0643905		0.214061	0.0869035
	-0.0041305	0.0619304		0.188023	0.0782762
	-0.0168176	0.0638634		0.186413	0.0835036
	-0.0139858	0.0583569		0.177892	0.0823569
	-0.0157907	0.0557411		0.14562	0.0789332
	0.0112594	0.0549361		0.140447	0.0784264
	0.0265885	0.0536947		0.14049	0.0765706
	-0.0105675	0.0504831		0.152152	0.082275
	-0.0313832	0.0515038		0.140533	0.072927
	-0.0549132	0.0496621		0.153341	0.0743529
	-0.0464581	0.0478563		0.133756	0.0737965
	-0.0539663	0.0475446		0.148856	0.07401
	-0.0679676	0.046994		0.133648	0.075769
	-0.0628741	0.0469202		0.124987	0.0761809
	-0.0540263	0.0504115		0.11574	0.0738888
	-0.0269281	0.049578		0.136343	0.0742503
	-0.0183554	0.0528825		0.134155	0.0786093
	-0.0236278	0.0511142		0.116046	0.0707587
	-0.0594286	0.0496709		0.108373	0.0696883
	-0.0905274	0.0481377		0.113994	0.0655824
	-0.0893347	0.0469487		0.109447	0.0665184
	-0.0598492	0.0435325		0.116929	0.0688252
	-0.0482815	0.0448938		0.10517	0.0663896
	-0.0183162	0.0524975		0.115505	0.066575
	-0.0646442	0.0466918		0.0890143	0.0665932
	-0.0810417	0.0438388		0.0910633	0.0666024
	-0.0845425	0.0408906		0.103741	0.073568
	-0.0899123	0.0378571		0.129212	0.0779989
	-0.107849	0.0398221		0.150383	0.081396
	-0.122983	0.0378159		0.12141	0.077991
	-0.139113	0.0408754		0.121622	0.0824749
	-0.141702	0.0405727		0.158583	0.0846136
	-0.10793	0.0447401		0.180492	0.0853076
	-0.0708502	0.0521078		0.207721	0.0859973
	0.0402486	0.0829077		0.192813	0.0833884
	0.0543546	0.0817656		0.165355	0.078667
	0.00323049	0.0686516		0.188759	0.0787835
	-0.029457	0.0659437		0.231266	0.0772656
	-0.0314975	0.0568471		0.267167	0.0808897
	-0.0502717	0.0489323		0.242052	0.0849372
	-0.0410802	0.0478449		0.227382	0.0795845
	-0.0622872	0.0450297		0.204438	0.0761197
	-0.0559112	0.048045		0.185549	0.0757907
	-0.0404689	0.0525801		0.158207	0.0794331
	-0.0688153	0.0466242		0.109433	0.0750488
	-0.0669997	0.0457451		0.095268	0.0713917
	-0.0432807	0.0514054		0.124993	0.0724439
	-0.0169293	0.0591009		0.117468	0.0707993
	-0.0440985	0.0505167		0.118396	0.0691254
	-0.0501956	0.0514108		0.122983	0.0717564
	-0.0540706	0.0470653		0.112239	0.0726704
	-0.0628009	0.0459595		0.0867259	0.0700013
	-0.0807103	0.0425805		0.0698968	0.0705536
	-0.0945029	0.0440537		0.0606515	0.0715795
	-0.0998058	0.0431708		0.0957335	0.0748273
	-0.0776002	0.0428969		0.0976349	0.0760426
	-0.0887336	0.0450503		0.0925212	0.0726651
	-0.102085	0.0462595		0.112909	0.0691157
	-0.0971552	0.0443313		0.134629	0.073219
	-0.0799449	0.0446994		0.131071	0.0699088
	-0.0719421	0.0455547		0.13567	0.0730728
	-0.0483914	0.0473972		0.135042	0.0721852
	-0.0591955	0.0480078		0.139863	0.0664612
	-0.0743349	0.0438853		0.179112	0.0656019
	-0.0785489	0.0418923		0.196285	0.0714207
	-0.0764426	0.0442335		0.152323	0.0662402
	-0.0913853	0.0406824		0.127711	0.0669963
	-0.0717607	0.044186		0.129966	0.0682773
	-0.0861017	0.0451548		0.12731	0.0668785
	-0.0781417	0.0483022		0.116849	0.0683251
	-0.0948017	0.0485608		0.150736	0.0801152
	-0.0826836	0.0453659		0.133911	0.0757564
	-0.0462399	0.0490021		0.120638	0.0770972
	-0.0674046	0.0479386		0.0962536	0.0747967
	-0.0648925	0.0461367		0.0871182	0.0688998
	-0.0757734	0.0454525		0.0733766	0.066089
	-0.0802407	0.0421235		0.0597665	0.06316
	-0.0725699	0.0457571		0.0564594	0.063273
	-0.0473842	0.0464414		0.0942914	0.0675204
	-0.0627651	0.042868		0.0809737	0.0758954
	-0.0459474	0.0437588		0.090247	0.0807466
	-0.0467927	0.0404871		0.0894296	0.0755195
	-0.0458895	0.040785		0.0893297	0.0807323
	-0.0647585	0.0396514		0.0820092	0.0753135
	-0.0818662	0.0397423		0.0829007	0.071277
	-0.0466803	0.0535208		0.102312	0.0681407
	-0.0547099	0.0626644		0.114386	0.079535
	-0.0683465	0.0569772		0.0832074	0.077058
	-0.052359	0.0504352		0.132283	0.092893
	-0.0766892	0.0458394		0.139093	0.0955871
	-0.0626448	0.0458963		0.143365	0.0903387
	-0.079843	0.0448968		0.14899	0.0871487
	-0.0406304	0.0539932		0.116826	0.0844085
	-0.0378563	0.0631512		0.116419	0.0874905
	-0.0408756	0.0665267		0.134707	0.0831824
	-0.0361128	0.0682029		0.128309	0.084078
	-0.0142546	0.0785086		0.12586	0.0786957
	0.00134701	0.0845016		0.127331	0.0808664
	0.00499166	0.0789235		0.117616	0.089181
	-0.0385931	0.0653568		0.0878827	0.0866977
	-0.014179	0.0716035		0.0890116	0.0810065
	-0.0423465	0.0621249		0.0891998	0.0849426
	-0.0164187	0.0542402		0.101453	0.0851937
	-0.0205926	0.0519467		0.160934	0.0871535
	-0.0235871	0.0496303		0.165027	0.0889928
	-0.0097305	0.0492112		0.188524	0.0934275
	-0.0134234	0.0474881		0.161677	0.0904395
	0.0340114	0.0615339		0.15701	0.0898794
	0.00959506	0.0603794		0.141768	0.0842741
	0.0579625	0.0685512		0.127574	0.0864593
	0.0787803	0.0741424		0.119568	0.0827316
	0.0418048	0.0622408		0.104476	0.0803143
	0.0308164	0.05558		0.0936945	0.0800264
	0.0436351	0.055422		0.116936	0.0892748
	0.033126	0.0566097		0.097571	0.0896769
	-0.0138366	0.0544571		0.0764863	0.0856743
	-0.0440228	0.050044		0.0861321	0.082689
	-0.0520963	0.048286		0.115418	0.0843771
	-0.0480723	0.0474792		0.130981	0.0895649
	-0.0517916	0.0525979		0.129474	0.0885667
	-0.0604674	0.0515058		0.15196	0.0878803
	-0.0667552	0.0458336		0.122453	0.082269
	-0.0632493	0.0469522		0.140694	0.0911506
	-0.0454647	0.052359		0.134923	0.092205
	-0.0209883	0.0535444		0.149284	0.0902571
	0.00551485	0.0673136		0.132857	0.0918976
	0.0306488	0.0781186		0.0958107	0.0859497
	0.0453404	0.0768735		0.0922	0.0883222
	0.0105819	0.062179		0.062712	0.0864735
	-0.0065723	0.0563046		0.0667688	0.0882361
	0.00328055	0.057455		0.0714808	0.0847517
	-0.0258711	0.0537853		0.0647857	0.0781673
	-0.0444887	0.0522615		0.122754	0.0795096
	-0.0507071	0.0511573		0.110692	0.0782099
	-0.0613572	0.0489693		0.106157	0.0790009
	-0.06285	0.0504228		0.106026	0.0772123
	-0.0591686	0.0462512		0.0698005	0.0728596
	0.00331689	0.0744677		0.0848206	0.0699925
	0.0299981	0.0776665		0.0930445	0.0716318
	-0.0027009	0.0639254		0.0902217	0.0706799
	-0.0337011	0.0590657		0.0679705	0.0648927
	-0.0639201	0.0520969		0.0852251	0.0640138
	-0.0655804	0.047552		0.0787091	0.0642866
	-0.0440023	0.0463175		0.0629941	0.0635775
	-0.0404021	0.0435493		0.0799909	0.068947
	-0.0083973	0.0492388		0.0729325	0.0705816
	0.0315776	0.0550175		0.0555686	0.0682452
	0.0074225	0.053659		0.0651665	0.0666736
	0.00777931	0.0541682		0.06613	0.0649268
	0.00626379	0.0500788		0.0719375	0.0663581
	0.00515668	0.0501928		0.069753	0.0660328
	0.0447991	0.0687317		0.0767028	0.0655475

## Sheet: Figure 2C-D
		Before																														After
	Water 1st	0.0265064	-0.281743	-0.212961	-0.0440037	-0.058845	-0.0140751	-0.0287439	-0.221091	0.0705163	-0.11441	-0.0624648	-0.0854594	0.379698	0.111747	0.174935	0.345073	-0.0685139	0.00356723	0.277293	-0.125102	-0.326025	-0.178606	-0.241469	-0.250916	0.120678	0.0244425	0.0338175	-0.117398	-0.10742	-0.0732769	0.00086166	-0.292989	-0.200842	-0.130851	0.0141063	-0.0349714	-0.177764	0.148896	0.0484391	-0.17196	-0.000697	-0.0237905	0.53275	0.115475	0.242828	0.244388	-0.04142	-0.0182559
	Water 2nd	-0.0743351	-0.361084	-0.261735	-0.249664	-0.11729	-0.0427826	-0.298845	-0.213791	-0.166347	-0.0710365	-0.15471	-0.0381018	-0.0524822	-0.0482079	-0.124854	-0.278237	-0.0037352	0.0848755	-0.0273029	-0.0078967	0.13417	0.00145274	-0.339483	-0.33176	0.0402009	-0.07369	-0.0780384	-0.0442077	-0.113773	0.130694	-0.109113	-0.362478	-0.295433	-0.184778	0.00224964	-0.0408599	-0.162911	-0.226279	0.0367537	-0.164977	-0.0785077	0.0214934	-0.0507274	0.10402	-0.0999966	0.170053	0.0478218	0.0712187
	Cadaverine 1st	-0.240733	-0.32116	-0.190974	-0.138422	0.0224078	-0.0936011	-0.379991	-0.146771	-0.115314	-0.201587	-0.160167	0.0557309	-0.230725	-0.16126	-0.240401	-0.284004	0.149651	0.100216	-0.276162	0.0405705	0.193644	-0.230358	-0.332202	-0.215422	0.441686	0.0126	0.112708	0.0178596	-0.0391512	0.255994	-0.188221	-0.0491657	0.328355	-0.208013	-0.0128762	-0.0184302	-0.464508	0.185873	0.401305	-0.0414918	-0.193714	0.129532	-0.266871	-0.134258	-0.171976	-0.461097	0.18407	0.596297
	Cadaverine 2nd	-0.0507759	-0.321292	-0.220614	-0.129061	-0.0858308	-0.0484941	0.107621	0.574705	0.653977	-0.239855	-0.156521	-0.0417321	-0.537555	-0.172349	-0.194663	-0.465432	-0.0529229	0.0516298	-0.438082	0.237906	-0.224794	-0.37368	-0.348925	-0.348334	0.199341	-0.0271503	-0.170642	0.124963	0.0165182	0.466827	-0.248188	0.335745	0.541914	0.0332639	-0.0430462	0.157378	-0.0004906	0.373884	0.715845	0.143706	-0.357862	0.017144	-0.477322	-0.168875	-0.0818265	-0.44567	-0.0222676	0.155035
		Before																																											After
	Water 1st	0.0743527	-0.0899068	-0.220928	-0.178344	-0.17268	-0.105543	-0.111805	-0.0771006	-0.251063	-0.348471	-0.0245651	0.187213	-0.0425884	-0.0889592	-0.0315521	0.333092	0.0291975	-0.110439	0.0538163	0.395057	0.0558639	0.526401	-0.105128	-0.0591362	0.116362	-0.270164	-0.231658	-0.15376	-0.210069	-0.0065953	-0.0247082	0.111593	0.0621986	0.0895475	-0.0409106	-0.0604398	0.0828572	-0.0092453	-0.0033698	0.100776	0.0455091	0.054218	-0.0522921	0.0762401	-0.0007431	0.0397314	-0.128699	-0.288996
	Water 2nd	-0.0663777	0.112996	0.286612	0.147407	-0.229625	-0.16605	0.0181908	0.18165	-0.110677	-0.171212	0.0400115	-0.0487029	-0.0328476	0.0471219	0.242779	-0.350302	-0.168165	0.340335	-0.244483	-0.110717	-0.207918	0.417692	0.0386821	-0.180282	-0.333053	0.23321	-0.126252	-0.0710479	-0.205985	-0.128298	0.156945	1.04979	0.359747	0.15815	0.110091	0.244478	0.0333977	-0.0734436	0.0448619	0.317514	0.131245	0.218943	0.0731921	0.107257	-0.0823553	0.834456	0.0118169	-0.322658
	Chondroitin Sulfate 1st	-0.0542431	-0.35908	-0.0226963	-0.121995	-0.367332	-0.140585	0.0289403	0.0350427	-0.0446207	-0.259219	-0.047611	0.104882	-0.0592974	-0.098954	-0.0856083	0.0998032	-0.0229342	-0.0395668	0.104431	0.774716	0.0330822	-0.390669	-0.0140929	-0.143178	-0.0988748	-0.243595	-0.29255	-0.0150584	-0.0102715	-0.14027	0.127238	0.204449	0.356228	0.276846	-0.0043701	0.12857	0.0473396	-0.249625	-0.0561601	0.670091	0.374569	0.171981	0.389731	0.50717	-0.260467	0.209616	-0.0816283	-0.235067
	Chondroitin Sulfate 2nd	0.0008062	-0.435869	-0.099824	-0.218921	-0.112657	-0.0771821	-0.0981022	-0.221493	0.198432	0.282561	-0.186735	-0.376304	-0.102231	0.156727	-0.0377001	-0.563611	-0.249386	0.295359	-0.230591	0.41657	0.00197311	0.300032	0.133549	0.166521	-0.368312	0.518638	-0.342285	0.247365	-0.117849	-0.229461	0.172859	0.402212	0.730191	1.32984	0.125591	0.407455	0.946155	-0.272114	0.0996985	1.03329	0.101885	-0.0115312	0.744262	0.137708	-0.47127	0.273404	-0.167698	-0.352769
[truncated: 38 more columns]

## Sheet: Figure 2H
		Left																															Right
	Water	11	6	6	0	0	5	6	0	0	0	5	0	6	4	11	1	4	1	20	4	0	0	0	0	0	5	3	8	0	0	5	6	6	7	0	0	10	6	4	0	6	3	0	5	17	8	8	10
	Cadaverine	0	0	15	6	1	1	0	0	0	0	8	0	12	10	6	3	6	12	10	24	0	3										14	19	23	15	16	21	22	2	12	24	11	12	23	20	21	15	16
	Alarm Substance	26	13	16	20	40	31	9	1	27	0	0	13	42	11	6	16	13	19	24	8	10	41	52	26	24	34	52	16	11			17	2	16	10	21	14	14	11	20	0	19	0	28	17	6	14	8
[truncated: 14 more columns]
