# Supplementary material for: Specialized neurons in the right habenula mediate response to aversive olfactory cues
Source: eLife. 2021 Dec 8;10:e72345. doi: 10.7554/eLife.72345 (PMC8691842; doi:10.7554/eLife.72345)
Supplement: Figure 3—figure supplement 1—source data 1. [file elife-72345-fig3-figsupp1-data1.xlsx]

## Sheet: Figure 3-figure supplement 1A
		Cre -												Cre +
		1min	2min	3min	4min	5min	6min	7min	8min	9min	10min			1min	2min	3min	4min	5min	6min	7min	8min	9min	10min
	Fish 1	-0.168846	-0.298859	0.0473268	-0.390602	-0.0203179	-0.493186	-0.803224	0.0595426	0.301782	-0.448524		Fish 1	-0.180145	-0.199333	-0.325912	-0.682247	0.587974	-0.596544	-0.951083	-0.755771	-0.98667	-0.908814
	Fish 2	0.652681	-0.526829	-0.759377	-0.38787	-0.565436	-0.837777	-0.936667	-0.95552	-0.999444	-0.999443		Fish 2	-0.120758	0.666946	0.458692	-0.522671	-0.773701	-0.6307	-0.904947	-0.872152	-0.999444	-0.999443
	Fish 3	-0.418636	-0.336113	-0.437797	-0.438195	-0.376356	-0.577425	-0.89544	-0.786429	-0.859443	-0.792931		Fish 3	-0.0439372	0.138726	-0.362625	-0.426348	-0.539232	-0.277839	0.00222705	0.831573	0.902777	0.53936
	Fish 4	-0.766899	-0.422692	0.423482	-0.391209	-0.246941	-0.578507	-0.91551	-0.955532	-0.999444	-0.858294		Fish 4	-0.352974	-0.742777	-0.325917	-0.310535	0.614122	0.101393	-0.376949	-0.751183	-0.819393	-0.933853
	Fish 5	-0.149778	-0.186732	-0.245828	0.0514598	0.207012	-0.417453	-0.772587	-0.627155	0.389924	0.94054		Fish 5	-0.511395	-0.142619	-0.521268	-0.3862	-0.947777	-0.531703	-0.695857	-0.855436	-0.96611	-0.999443
	Fish 6	-0.267612	-0.146036	-0.358374	-0.0545662	-0.176504	-0.642539	-0.886604	-0.909393	-0.730886	-0.338714		Fish 6	-0.217923	0.621457	-0.352237	-0.467855	0.177648	-0.91111	-0.675569	-0.162261	-0.410291	-0.669076
	Fish 7	-0.433972	-0.582197	-0.270451	-0.535764	-0.932186	-0.407573	-0.529249	-0.745332	-0.785258	-0.927203		Fish 7	-0.328143	-0.0980508	-0.0465063	-0.0784641	-0.451362	-0.759176	-0.874965	-0.85917	-0.956086	-0.970548
	Fish 8	-0.658144	-0.763758	-0.0701169	-0.63338	-0.999443	-0.993888	-0.999444	-0.999443	-0.461625	0.48109		Fish 8	0.389152	-0.384316	-0.475528	0.695941	0.441136	0.0328863	-0.876007	0.833148	0.990554	0.986102
	Fish 9	-0.131184	0.95552	0.999444	0.999443	0.967232	-0.565386	-0.926626	-0.977771	-0.823792	-0.999443		Fish 9	0.393873	0.389754	0.480657	0.192328	0.38838	-0.247492	-0.892658	-0.603118	0.0244841	-0.892193
	Fish 10	0.305531	-0.633585	0.801557	0.596218	0.292872	-0.143176	-0.560377	-0.93	-0.879967	-0.860994		Fish 10	0.397442	0.36432	-0.271563	-0.00334076	-0.303453	-0.251253	-0.931667	-0.854717	-0.523649	-0.529249
	Fish 11	0.364699	0.421506	0.0997494	0.211902	0.516129	-0.872188	-0.816616	-0.424681	0.863371	0.999443		Fish 11	-0.0958763	-0.278132	-0.309041	-0.74993	-0.515557	-0.449235	-0.999443	-0.972769	-0.882712	-0.13298
	Fish 12	-0.127505	-0.0711512	-0.309406	-0.0662204	0.0144916	-0.386755	-0.663977	-0.314014	-0.778272	-0.682805		Fish 12	-0.112904	0.126392	0.0837746	0.307158	0.447566	-0.825411	-0.93389	-0.881634	-0.613011	-0.8153
	Fish 13	0.741595	-0.130072	-0.555186	-0.320733	-0.973333	-0.723983	-0.721589	-0.800335	-0.851584	-0.992773		Fish 13	0.0308763	-0.440022	-0.204673	-0.726515	-0.512642	-0.551418	-0.635253	-0.571071	-0.0520172	-0.416017
	Fish 14	0.226148	-0.46789	-0.941634	0.408976	0.537563	-0.760845	-0.999443	-0.999443	-0.766472	-0.78371		Fish 14	0.199442	0.253415	0.102257	0.0648116	0.130532	-0.538333	0.122249	0.702507	0.982772	0.971667
	Fish 15	-0.40551	-0.0704153	-0.145323	-0.811562	-0.324985	-0.603563	-0.584097	-0.899359	-0.999444	-0.441292		Fish 15	0.128134	-0.0727223	-0.0522798	-0.176044	0.658958	-0.353366	0.231839	0.698471	0.735669	0.956643
