# Supplementary material for: Specialized neurons in the right habenula mediate response to aversive olfactory cues
Source: eLife. 2021 Dec 8;10:e72345. doi: 10.7554/eLife.72345 (PMC8691842; doi:10.7554/eLife.72345)
Supplement: Figure 3—figure supplement 3—source data 1. [file elife-72345-fig3-figsupp3-data1.xlsx]

## Sheet: Figure 3-figure supplement 3
		Left				Right
	5 dpf	0	0	0	0	14	32	15	31
	14 dpf	1	0	3	1	39	20	47	30
	21 dpf	1	0	2	2	34	24	46	33
