# Supplementary material for: Specialized neurons in the right habenula mediate response to aversive olfactory cues
Source: eLife. 2021 Dec 8;10:e72345. doi: 10.7554/eLife.72345 (PMC8691842; doi:10.7554/eLife.72345)
Supplement: Figure 3—source data 1. [file elife-72345-fig3-data1.xlsx]

## Sheet: Figure 3G
		Before															After 1 min															After 2 min															After 3 min
	Cre -	-0.20546	-0.476653	-0.407276	-0.319075	0.129236	-0.115535	-0.733975	-0.816412	0.983338	0.444545	0.364015	-0.0258644	-0.647033	0.47327	-0.568274	-0.493186	-0.837777	-0.577425	-0.578507	-0.417453	-0.642539	-0.407573	-0.993888	-0.565386	-0.143176	-0.872188	-0.386755	-0.723983	-0.760845	-0.603563	-0.803224	-0.936667	-0.89544	-0.91551	-0.772587	-0.886604	-0.529249	-0.999444	-0.926626	-0.560377	-0.816616	-0.663977	-0.721589	-0.999444	-0.584097	0.059543	-0.95552	-0.786429
	Cre +	-0.0471366	-0.648186	-0.48279	0.151793	-0.666988	-0.145103	-0.264913	0.568539	0.290354	-0.153397	-0.632744	0.377362	-0.619578	0.0976719	0.241457	-0.596544	-0.6307	-0.277839	0.101393	-0.531703	-0.91111	-0.759176	0.032886	-0.247492	-0.251253	-0.449235	-0.825411	-0.551418	-0.538333	-0.353366	-0.951083	-0.904947	0.002227	-0.376949	-0.695857	-0.675569	-0.874965	-0.876007	-0.892658	-0.931667	-0.999444	-0.93389	-0.635253	0.122249	0.231839	-0.755771	-0.872152	0.831573
[truncated: 12 more columns]

## Sheet: Figure 3H
		Before																	After
	Cre -	6.1565	2.1725	6.4094	5.443	6.9561	4.1934	4.5482	1.8941	2.5555	0.089	2.9258	2.1575	4.1047	5.5409	3.2732	1.9552	2.1362	13.8414	7.8726	7.3195	8.0232	19.4381	4.2634	11.0276	6.7552	11.3844	0.1756	4.4958	6.5161	4.5474	7.6226	5.2351	2.247	5.4927
	Cre +	5.8224	2.9903	4.5607	3.6319	2.8036	7.9125	7.1608	2.6671	5.0905	2.3623	3.6877	5.3442	4.1882	2.8414	2.061	2.3259	2.8756	6.0241	4.9107	8.548	18.0509	3.8806	5.8084	8.1634	10.211	8.9703	5.9688	10.5853	13.8092	3.5953	5.5639	3.6487	8.719	8.3942

## Sheet: Figure 3I
		Before																	After
	Cre -	40.1167	156.633	174.167	223.017	110.2	58.3	217.883	229.467	6.7667	188.6	0.0167	131.883	74.4333	192.117	150.65	143.483	36.3333	0.0167	13.9833	3.0167	3.5333	4.3667	0.0167	1.1833	4.4833	0.0167	34.0667	21.4167	8.2333	0.7167	27.05	8.1167	10.1833	0.0167
	Cre +	138.217	75.2833	56	136.117	235.817	61.5167	140.2	164.15	186.917	52.2167	9.7667	98.6	18.5333	96.4167	117.217	50.15	5.1167	0.0667	19.5167	11.25	18.45	54.4833	1.55	30.3167	11.2167	6.4667	3.2833	2.3333	22.3333	8.3833	4.95	19.45	10.8333	0.0167

## Sheet: Figure 3-J-K
		Onset of fast swim				Interval time
		Cre -	Cre +			Cre -	Cre +
	Fish 1	17	1		Fish 1	283	10
	Fish 2	17	19		Fish 2	14	16
	Fish 3	6	3		Fish 3	21	10
	Fish 4	7	0		Fish 4	33	18
	Fish 5	4	15		Fish 5	53	22
	Fish 6	22	55		Fish 6	18	16
	Fish 7	13	35		Fish 7	20	12
	Fish 8	12	13		Fish 8	14	22
	Fish 9	26	17		Fish 9	19	32
	Fish 10	40	22		Fish 10	13	17
	Fish 11	38	20		Fish 11	11	80
	Fish 12	55	14		Fish 12	245	12
	Fish 13	58	30		Fish 13	18	15
	Fish 14	28	40		Fish 14	13	20
	Fish 15	40	23		Fish 15	30	20
	Fish 16	32	40		Fish 16	268	12
	Fish 17	10	39		Fish 17	98	21
