# Supplementary material for: Specialized neurons in the right habenula mediate response to aversive olfactory cues
Source: eLife. 2021 Dec 8;10:e72345. doi: 10.7554/eLife.72345 (PMC8691842; doi:10.7554/eLife.72345)
Supplement: Figure 4—figure supplement 1—source data 1. [file elife-72345-fig4-figsupp1-data1.xlsx]

## Sheet: Figure 4-figure supplement 1A
		WT siblings													tcf7l2 homozygotes
		1min	2min	3min	4min	5min	6min	7min	8min	9min	10min				1min	2min	3min	4min	5min	6min	7min	8min	9min	10min
	Fish 1	-0.30217	-0.843847	-0.920535	-0.432072	0.377506	0.0579393	0.0749925	0.570275	0.789825	0.677485			Fish 1	0.197214	0.416343	0.245136	0.438266	0.296409	0.0540385	0.747566	0.647287	0.923869	0.57274
	Fish 2	0.75174	-0.310727	0.102643	0.479009	0.947209	-0.0131113	0.942191	0.999443	0.932795	0.999443			Fish 2	0.561925	0.752777	0.689914	0.0242003	0.604671	-0.0261844	0.441292	0.222625	-0.013927	-0.153738
	Fish 3	0.200111	-0.377122	0.169402	0.581642	-0.18797	-0.643692	-0.805557	-0.879343	-0.843333	-0.243469			Fish 3	-0.0951586	0.075	0.0186255	0.546846	-0.312187	-0.542061	-0.83162	-0.545226	-0.198888	0.232397
	Fish 4	-0.132107	0.497638	-0.0738785	0.356329	0.91611	0.69616	0.157426	0.253133	0.994443	0.5			Fish 4	0.201446	0.477026	-0.192661	-0.728107	0.166064	-0.115128	0.659895	0.989994	0.999444	0.663696
	Fish 5	-0.21514	0.266759	-0.503616	-0.362448	0.327591	-0.288419	-0.878232	-0.70737	-0.671301	-0.999443			Fish 5	0.206234	0.288692	0.460918	0.342046	0.142301	0.351502	-0.116383	0.283408	-0.0951056	0.0794094
	Fish 6	-0.179189	0.0676692	-0.0781635	0.0334076	0.0473022	-0.696498	-0.929365	-0.949443	-0.947238	-0.989443			Fish 6	0.632164	0.180557	0.431275	0.0250278	-0.683157	-0.157719	-0.175194	0.185531	0.178402	0.155172
	Fish 7	-0.335559	0.126707	-0.276217	0.0147356	-0.0821047	0.0913145	-0.161291	-0.117548	0.103448	0.410849			Fish 7	-0.129902	-0.194545	0.0217028	0.0820589	-0.289965	-0.229057	-0.0834259	-0.268985	0.154852	0.233165
	Fish 8	-0.359866	-0.380422	-0.371587	-0.415925	-0.739711	-0.913261	-0.881077	-0.96	-0.953903	-0.973333			Fish 8	0.274296	0.357798	0.517509	-0.0266963	0.335003	0.257858	0.060918	0.0695996	0.316448	0.586649
	Fish 9	-0.184093	0.137212	-0.14683	0.341857	0.253268	-0.0851419	-0.158539	0.691366	0.419194	0.26559			Fish 9	0.106287	0.16199	-0.104811	-0.104561	-0.0706335	-0.0364592	-0.0581357	0.295657	0.0768375	0.219716
	Fish 10	-0.957765	-0.97889	-0.288419	0.599332	0.384787	-0.579182	-0.999444	-0.809894	-0.835557	-0.999443			Fish 10	0.909418	0.254793	0.358374	0.101142	-0.215675	-0.471342	-0.598663	-0.939427	-0.874339	-0.103256
	Fish 11	-0.205006	0.156782	0.187536	-0.0531896	-0.226615	-0.40306	-0.814185	-0.926606	-0.999443	-0.850945			Fish 11	0.0153252	-0.165924	-0.162027	-0.0813813	-0.206244	-0.0298127	-0.196215	-0.173623	0.0245251	-0.402171
	Fish 12	-0.392658	-0.327216	-0.298859	-0.355593	-0.29097	-0.296276	-0.378372	-0.391594	-0.404173	-0.34001			Fish 12	0.645519	0.715319	0.448928	0.370268	0.170419	0.268931	0.396436	0.545352	0.92885	0.488876
	Fish 13	-0.0325271	-0.336113	-0.309192	0	-0.0898965	-0.797552	-0.971094	-0.991108	-0.999444	-0.949986			Fish 13	0.494707	0.991667	0.137374	-0.452826	-0.704754	-0.344464	-0.282736	-0.469263	-0.659254	-0.755353
	Fish 14	-0.176078	-0.0819678	-0.142222	-0.166852	-0.167503	-0.265387	-0.437797	-0.289532	-0.0230759	-0.279356			Fish 14	0.243997	0.380847	-0.0511953	-0.28639	-0.00250767	-0.150446	-0.410028	-0.182376	-0.616712	-0.805232
	Fish 15	-0.540216	-0.0734148	-0.644048	-0.0626217	-0.309192	-0.93946	-0.91822	-0.96499	-0.948862	-0.939427			Fish 15	0.962213	-0.334445	-0.337413	-0.811457	0.66926	0.440825	0.252711	0.365052	0.22349	0.221358
