# Supplementary material for: Specialized neurons in the right habenula mediate response to aversive olfactory cues
Source: eLife. 2021 Dec 8;10:e72345. doi: 10.7554/eLife.72345 (PMC8691842; doi:10.7554/eLife.72345)
Supplement: Figure 4—source data 1. [file elife-72345-fig4-data1.xlsx]

## Sheet: Figure 4F
		Before															After 1 min															After 2 min															After 3 min
	WT	-0.0272828	0.713109	0.196836	0.636219	-0.0174288	0.0403549	-0.0336845	-0.577818	0.297562	0.49206	-0.139902	-0.323281	-0.0449483	-0.167177	-0.185907	0.057939	-0.013111	-0.643692	0.69616	-0.288419	-0.696498	0.091315	-0.913261	-0.085142	-0.579182	-0.40306	-0.296276	-0.797552	-0.265387	-0.93946	0.074993	0.942191	-0.805557	0.157426	-0.878232	-0.929365	-0.161291	-0.881077	-0.158539	-0.999444	-0.814185	-0.378372	-0.971094	-0.437797	-0.91822	0.570275	0.999443	-0.879343
	tcf7l2zf55/zf55	0.367337	0.314435	0.117329	-0.281021	0.242173	-0.329065	-0.103953	0.154153	-0.0875974	-0.0572661	-0.143813	0.270343	-0.57879	-0.144449	-0.0710987	0.054038	-0.026184	-0.542061	-0.115128	0.351502	-0.157719	-0.229057	0.257858	-0.036459	-0.471342	-0.029813	0.268931	-0.344464	-0.150446	0.440825	0.747566	0.441292	-0.83162	0.659895	-0.116383	-0.175195	-0.083426	0.060918	-0.058136	-0.598663	-0.196215	0.396436	-0.282736	-0.410028	0.252711	0.647287	0.222625	-0.545226
[truncated: 12 more columns]

## Sheet: Figure 4G
		Before										After
	WT	2.3378	1.2453	2.1634	2.3429	2.086	2.4116	1.3356	5.7934	3.6246	5.1077	6.033	4.1712	0.8906	3.9944	6.4063	4.108	3.6203	6.808	4.9072	7.9087
	tcf7l2zf55/zf55	0.7074	1.7687	0.6397	0.2665	0.957	2.5583	1.0751	1.8175	0.9575	0.6013	0.6687	5.5654	0.5146	0.2275	0.8049	3.4772	0.929	2.8536	3.2265	0.715

## Sheet: Figure 4H
		Before										After
	WT	170.883	54.3833	33.4667	9.0333	58.3667	73.4833	0.0167	31.1	2.15	3.9167	9.4833	0.0167	0.0167	6.7167	2.5833	62.8	0.0167	0.0167	0.0167	0.3
	tcf7l2zf55/zf55	227.233	93.2333	139.983	224.233	232.017	12.2667	94.0167	225.217	84.45	103.15	199.267	3.5833	21.9333	29.8667	16.8667	8.4667	6.5667	88.6	0.15	12.4

## Sheet: Figure 4I-J
		Onset of fast swim				Interval time
		WT	tcf7l2 homozygotes			WT	tcf7l2 homozygotes
	Fish 1	15	300		Fish 1	285	300
	Fish 2	15	20		Fish 2	22	280
	Fish 3	2	300		Fish 3	11	300
	Fish 4	28	62		Fish 4	20	238
	Fish 5	10	35		Fish 5	290	265
	Fish 6	17	10		Fish 6	283	290
	Fish 7	10	300		Fish 7	11	300
	Fish 8	7	17		Fish 8	26	283
	Fish 9	28	16		Fish 9	272	17
	Fish 10	18	300		Fish 10	22	300
