# Supplementary material for: Specialized neurons in the right habenula mediate response to aversive olfactory cues
Source: eLife. 2021 Dec 8;10:e72345. doi: 10.7554/eLife.72345 (PMC8691842; doi:10.7554/eLife.72345)
Supplement: Figure 5—figure supplement 1—source data 1. [file elife-72345-fig5-figsupp1-data1.xlsx]

## Sheet: Figure 5-figure supplement 1A
		bsx heterozygotes											bsx homozygotes
		1min	2min	3min	4min	5min	6min	7min	8min	9min	10min			1min	2min	3min	4min	5min	6min	7min	8min	9min	10min
	Fish 1	0.0740529	-0.22417	0.168152	-0.0331563	-0.331848	-0.330171	-0.829301	-0.899359	-0.95164	-0.999443		Fish 1	-0.375348	-0.268974	-0.340401	-0.355468	-0.36971	-0.189295	0.0584958	0.244431	0.0762371	-0.0703124
	Fish 2	0.477438	0.638589	0.505705	0.580207	0.0439861	-0.343724	0.134503	-0.188058	-0.771047	-0.821976		Fish 2	-0.03379	-0.157835	-0.0120134	-0.12067	-0.0895397	-0.0217513	-0.0500835	-0.0506958	-0.0292723	-0.0223209
	Fish 3	0.0798325	-0.350419	-0.0339638	0.624443	0.722469	-0.160011	-0.334821	0.193745	-0.0055705	0.0191934		Fish 3	-0.0359632	0.205243	0.0672234	0.219676	0.356167	0.551476	0.527414	0.302937	0.23426	0.399722
	Fish 4	0.278798	-0.0453413	-0.665087	-0.668429	-0.304565	-0.376738	0.0133779	0.208601	0.829396	0.64385		Fish 4	-0.140787	-0.0381716	-0.150334	-0.123746	-0.139508	0.0872114	0.486622	0.207916	0.301756	0.492894
	Fish 5	0.146689	0.34687	0.621908	0.238255	0.950529	-0.195211	-0.0156157	0.333705	0.342428	0.27207		Fish 5	0.368245	0.4039	0.22334	0.161074	0.565073	0.49401	0.48635	0.401447	0.476589	0.445838
	Fish 6	-0.302728	-0.13046	-0.778333	-0.439778	-0.136883	-0.521314	-0.553327	0.0759389	0.600112	0.0965762		Fish 6	0.799276	0.105292	0.659895	-0.118225	-0.22151	0.205236	0.153119	0.958171	0.449009	0.557665
	Fish 7	0.188196	-0.0119733	-0.333705	0.360956	0.0150418	0.123013	0.527709	0.0214898	-0.256331	-0.274498		Fish 7	-0.0894897	0.0882774	-0.0673713	-0.0623272	-0.220056	-0.108018	-0.0030644	0.0524255	0.0492899	-0.0651448
	Fish 8	-0.0769661	0.100642	-0.210233	-0.0831705	0.403625	-0.128419	-0.443948	-0.837641	-0.785872	-0.172991		Fish 8	-0.324973	-0.162441	-0.231283	-0.118663	-0.19743	-0.210585	0.136415	0.157983	0.0219878	-0.167224
	Fish 9	-0.0342714	-0.673163	-0.594985	-0.188235	0.946682	-0.783722	-0.603007	-0.610123	0.64214	0.256825		Fish 9	0.109685	0.118238	-0.0267559	-0.003903	-0.0200446	-0.184628	0.0384401	-0.177258	-0.224818	-0.10783
	Fish 10	-0.310844	0.0219755	-0.0397991	-0.277933	-0.159242	-0.379387	-0.343733	-0.10783	-0.484857	0.192972		Fish 10	-0.321806	0.157218	-0.0198596	-0.186384	-0.278706	-0.283641	0.231541	-0.116071	0.116487	-0.116435
	Fish 11	-0.0206814	-0.170149	-0.106099	-0.288902	0.259342	0.0399564	0.0722058	0.225969	0.877675	0.563091		Fish 11	0.00780268	-0.440379	-0.24805	-0.226652	-0.230812	-0.20903	0.0579699	0.044592	0.0874159	0.0931405
	Fish 12	-0.0819398	-0.266	-0.676217	-0.21502	-0.732405	-0.0125243	0.301951	0.715952	0.087369	0.130119		Fish 12	-0.125662	-0.268728	-0.388131	-0.362496	-0.192934	-0.175845	-0.02537	0.350824	-0.0540385	-0.154725
	Fish 13	0.139122	-0.468333	0.400167	0.186421	0.0127925	-0.0538961	-0.199777	-0.883204	-0.38393	0.119532		Fish 13	-0.550236	-0.271008	-0.061465	0.311786	-0.336869	-0.713567	0.298917	-0.111546	-0.11403	0.439093
	Fish 14	0.152089	0.0440368	0.137834	-0.117122	-0.248392	-0.532461	-0.636162	-0.367688	0.564225	0.685586		Fish 14	-0.516299	-0.0185393	0.00926706	0.00417944	0.065515	-0.0540541	0.0694785	-0.415736	-0.29849	-0.219129
	Fish 15	0.645815	0.698722	0.579505	0.621593	0.561437	0.680756	0.0675218	-0.17372	0.0300835	0.121069		Fish 15	0.175879	0.134878	-0.104393	-0.311995	-0.119799	-0.185165	-0.188179	-0.564346	0.0540083	0.576753
