# Supplementary material for: Specialized neurons in the right habenula mediate response to aversive olfactory cues
Source: eLife. 2021 Dec 8;10:e72345. doi: 10.7554/eLife.72345 (PMC8691842; doi:10.7554/eLife.72345)
Supplement: Figure 5—source data 1. [file elife-72345-fig5-data1.xlsx]

## Sheet: Figure 5E
		Left																	Right
	bsxm1376/+	3	5	2	1	37	26	16	11	10	5	18	5	4	6	7	2	3	16	20	14	5	36	25	24	27	14	5	17	11	5	10	20	6	7
	bsxm1376/m1376	10	18	11	21	23	11	21	28	21	23	16	19	7	18				22	19	19	19	26	18	28	8	15	21	8	29	12	15

## Sheet: Figur 5F
		Before															After 1 min															After 2 min															After 3 min
	bsxm1376/+	-0.182502	0.312096	0.673456	-0.486497	0.594392	-0.28833	0.187999	0.160227	0.379223	-0.218587	-0.0147798	-0.473713	0.0996066	-0.182757	0.591515	-0.330171	-0.343724	-0.160011	-0.376738	-0.195211	-0.521314	0.123013	-0.128419	-0.783722	-0.379387	0.039956	-0.012524	-0.053896	-0.532461	0.680756	-0.829301	0.134503	-0.334821	0.013378	-0.015616	-0.553327	0.527709	-0.443948	-0.603007	-0.343733	0.072206	0.301951	-0.199777	-0.636162	0.067522	-0.89936	-0.188058	0.193745
	bsxm1376/m1376	-0.362589	-0.105105	0.287921	-0.131627	0.363073	-0.169868	-0.141192	-0.158047	-0.0119738	-0.232545	-0.228732	-0.277715	-0.0125413	0.0348472	-0.215897	-0.189295	-0.021751	0.551476	0.087211	0.49401	0.205236	-0.108018	-0.210585	-0.184628	-0.283642	-0.20903	-0.175845	-0.713567	-0.054054	-0.185165	0.058496	-0.050084	0.527414	0.486622	0.48635	0.153119	-0.003064	0.136415	0.03844	0.231541	0.05797	-0.02537	0.298917	0.069478	-0.188179	0.244431	-0.050696	0.302937
[truncated: 12 more columns]

## Sheet: Figure 5G
		Before															After
	bsxm1376/+	1.6218	1.7007	4.507	0.4274	1.2033	0.8965	1.0238	3.2347	0.6124	0.3936	1.3007	0.9257	0.2466	0.1316	0.0736	1.8684	2.7039	7.7832	4.4253	5.019	1.2803	2.8313	3.6723	3.9213	3.2952	1.4787	2.5031	5.5699	4.1822	2.2891
	bsxm1376/m1376	0.3428	0.3524	0.4141	0.178	0.4601	0.3918	0.5487	0.2072	0.2586	0.5849	1.199	0.5159	0.357	1.1678	0.0224	4.7234	2.8946	3.9527	0.8804	4.6892	2.9407	1.3648	3.4112	2.5966	2.25	5.7283	1.2497	2.2022	1.8636	1.2562

## Sheet: Figure 5H
		Before															After
	bsxm1376/+	102.3	18.8333	3.7667	42.3167	75.4	77.75	139.367	68.5833	32.5	81.5167	109.9	31.1833	52.0833	98.6	19.1167	2.9667	1.8167	0.45	0.0167	6.4833	46.35	12.95	5.0667	10.4333	1.9833	24.65	0.6833	5.3	0.0167	0.0167
	bsxm1376/m1376	126.3	165.983	38.55	242.283	274.367	0.1667	216.433	222.917	296.25	294.467	299.95	210.217	277.033	211.75	46.25	27.9833	22.4667	10.9333	138.433	19.6	0.0167	10.8	19.0167	125.85	108.733	35	180.767	45.4	0.55	22.2833

## Sheet: Figure 5I-J
		Onset of fast swim				Onset of fast swim
		bsx heterozygotes	bsx homozygotes			bsx heterozygotes	bsx homozygotes
	Fish 1	14	38		Fish 1	286	262
	Fish 2	23	50		Fish 2	13	47
	Fish 3	8	28		Fish 3	44	32
	Fish 4	17	55		Fish 4	23	245
	Fish 5	33	26		Fish 5	29	274
	Fish 6	1	29		Fish 6	299	57
	Fish 7	22	18		Fish 7	278	282
	Fish 8	13	21		Fish 8	69	29
	Fish 9	14	27		Fish 9	83	273
	Fish 10	13	70		Fish 10	13	230
	Fish 11	300	30		Fish 11	300	270
	Fish 12	2	66		Fish 12	12	234
	Fish 13	17	45		Fish 13	32	255
	Fish 14	3	20		Fish 14	10	280
	Fish 15	17	43		Fish 15	56	30
